# Supplementary material for: Development and validation of a predictive algorithm for risk of dementia in the community setting
Source: HighWire-hosted journal article supplement (doi:10.1136/jech-2020-214797), 2021-06-24

## **Supplementary Files**

**Supplementary File 1.** Cumulative incidence curves for dementia and death for (A) males and (B) females in the combined derivation and validation cohorts

**Supplementary File 2.** Baseline study characteristics of male and female derivation and validation cohorts, with missingness

**Supplementary File 3.** Male and female partial correlation plots

**Supplementary File 4.** DemPoRT subdistribution hazard ratios for full and reduced models – males

**Supplementary File 5.** DemPoRT subdistribution hazard ratios for full and reduced models – females

**Supplementary File 6.** DemPoRT reduced formulas for risk

**Supplementary File 7.** Observed versus predicted for subgroups in the validation model – males

**Supplementary File 8.** Observed versus predicted for subgroups in the validation model – females

**Supplementary File 1.** Cumulative incidence curves for dementia and death for (A) males and (B) females in the combined derivation and validation cohorts

(A)

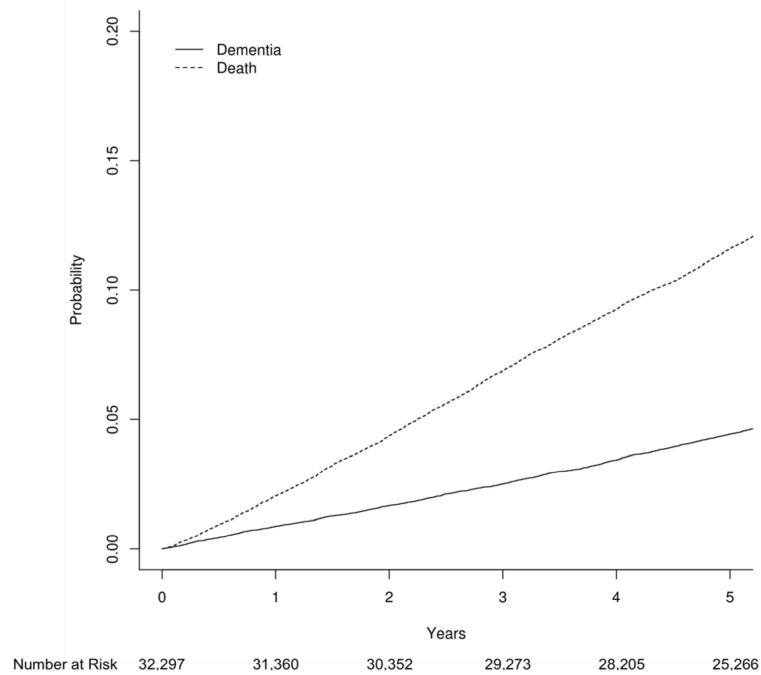

(B)

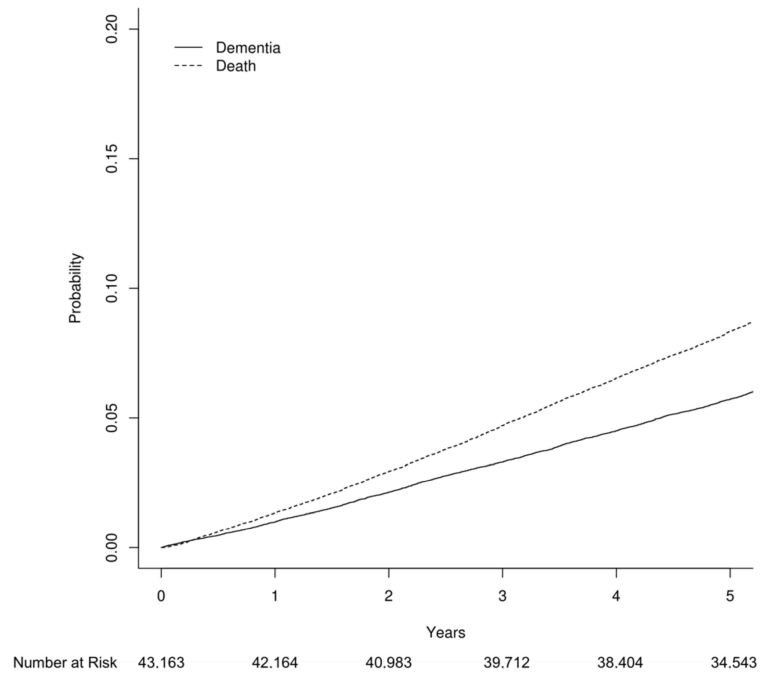

**Supplementary File 2.** Baseline study characteristics of male and female derivation and validation cohorts, with missingness

| Characteristic <sup>a</sup>               | Male Cohort             |                         | Female Cohort           |                         |
|-------------------------------------------|-------------------------|-------------------------|-------------------------|-------------------------|
|                                           | Derivation <sup>b</sup> | Validation <sup>c</sup> | Derivation <sup>b</sup> | Validation <sup>c</sup> |
| N                                         | 20,506                  | 11,791                  | 27,233                  | 15,930                  |
| Person-years of follow-up                 | 94,237                  | 53,979                  | 126,735                 | 73,726                  |
| Dementia events (5 years)                 | 2,367                   | 647                     | 4,367                   | 1,067                   |
| Deaths (5 years)                          | 905                     | 518                     | 1,616                   | 836                     |
| <b>Socio-demographic Factors</b>          |                         |                         |                         |                         |
| Age, median [IQR]                         | 66.0 (60.0, 74.0)       | 66.0 [60.0, 74.0]       | 68.0 [61.0, 76.0]       | 67.0 (61.0, 76.0)       |
| Ethnicity                                 |                         |                         |                         |                         |
| White                                     | 19,145 (93.4)           | 10,785 (91.5)           | 25,700 (94.4)           | 14,765 (92.7)           |
| South Asian/Arab/West Asian               | 347 (1.7)               | 208 (1.8)               | 360 (1.3)               | 184 (1.2)               |
| Japanese/Korean/South East Asian/Filipino | 274 (1.3)               | 224 (1.9)               | 243 (0.9)               | 276 (1.7)               |
| Other/Multiple Origin/Unknown             | 637 (3.1)               | 479 (4.1)               | 831 (3.1)               | 597 (3.7)               |
| Missing                                   | 103 (0.5)               | 95 (0.8)                | 99 (0.4)                | 108 (0.7)               |
| Immigrant                                 |                         |                         |                         |                         |
| Yes                                       | 5,500 (26.8)            | 2,926 (24.8)            | 6,804 (25.0)            | 3,769 (23.7)            |
| No                                        | 14,981 (73.1)           | 8,818 (74.8)            | 20,391 (74.9)           | 12,109 (76.0)           |
| Missing                                   | 103 (0.5)               | 47 (0.4)                | 38 (0.1)                | 52 (0.3)                |
| Education                                 |                         |                         |                         |                         |
| Less than secondary school                | 6,380 (31.1)            | 2,792 (23.7)            | 9,402 (34.5)            | 3,833 (24.1)            |
| Secondary school graduate                 | 2,902 (14.2)            | 1,840 (15.6)            | 5,494 (20.2)            | 3,429 (21.5)            |
| Some post-secondary                       | 1,148 (5.6)             | 499 (4.2)               | 1,454 (5.3)             | 665 (4.2)               |
| Post-secondary graduate                   | 9,847 (48.0)            | 6,564 (55.7)            | 10,636 (39.1)           | 7,888 (49.5)            |
| Missing                                   | 229 (1.1)               | 96 (0.8)                | 247 (0.9)               | 115 (0.7)               |
| Marital status                            |                         |                         |                         |                         |
| Now married/Common-law                    | 14,791 (72.1)           | 8,316 (70.5)            | 13,070 (48.0)           | 7,873 (49.4)            |
| Separated/Divorced                        | 2,122 (10.3)            | 1,358 (11.5)            | 3,180 (11.7)            | 2,130 (13.4)            |
| Widowed                                   | 2,224 (10.8)            | 1,175 (10.0)            | 9,642 (35.4)            | 4,928 (30.9)            |
| Single                                    | 1,364 (6.7)             | 934 (7.9)               | 1,325 (4.9)             | 981 (6.2)               |
| Missing                                   | 5 (0.0)                 | 8 (0.1)                 | 16 (0.1)                | 18 (0.1)                |
| Neighbourhood Deprivation                 |                         |                         |                         |                         |
| Low                                       | 4,153 (20.3)            | 2,289 (19.4)            | 4,720 (17.3)            | 2,677 (16.8)            |
| Moderate                                  | 12,753 (62.2)           | 7,423 (63.0)            | 17,147 (63.0)           | 10,160 (63.8)           |
| High                                      | 2,997 (14.6)            | 1,705 (14.5)            | 4,429 (16.3)            | 2,538 (15.9)            |
| Missing                                   | 603 (2.9)               | 374 (3.2)               | 937 (3.4)               | 555 (3.5)               |
| Multilingual                              |                         |                         |                         |                         |
| Yes                                       | 14,018 (68.4)           | 1,743 (14.8)            | 7,402 (27.2)            | 2,103 (13.2)            |
| No                                        | 6,471 (31.6)            | 4,054 (34.4)            | 19,816 (72.8)           | 5,741 (36.0)            |
| Missing <sup>d</sup>                      | 17 (0.1)                | 5,994 (50.8)            | 15 (0.1)                | 8,086 (50.8)            |
| <b>General Health</b>                     |                         |                         |                         |                         |
| Sense of belonging                        |                         |                         |                         |                         |
| Very strong                               | 5,075 (24.7)            | 2,766 (23.5)            | 7,156 (26.3)            | 3,987 (25.0)            |
| Somewhat strong                           | 8,951 (43.7)            | 5,518 (46.8)            | 12,011 (44.1)           | 7,657 (48.1)            |
| Somewhat weak                             | 3,805 (18.6)            | 2,075 (17.6)            | 5,083 (18.7)            | 2,709 (17.0)            |
| Very weak                                 | 1,628 (7.9)             | 859 (7.3)               | 2,271 (8.3)             | 1,095 (6.9)             |
| Missing                                   | 1,047 (5.1)             | 573 (4.9)               | 712 (2.6)               | 482 (3.0)               |
| Self-perceived stress                     |                         |                         |                         |                         |
| Not at all stressful                      | 4,871 (23.8)            | 2,616 (22.2)            | 5,102 (18.7)            | 2,616 (16.4)            |
| Not very stressful                        | 6,420 (31.3)            | 3,635 (30.8)            | 8,554 (31.4)            | 4,772 (30.0)            |
| A bit stressful                           | 6,491 (31.7)            | 3,867 (32.8)            | 9,394 (34.5)            | 5,739 (36.0)            |
| Quite a bit stressful                     | 2,154 (10.5)            | 1,348 (11.4)            | 3,353 (12.3)            | 2,279 (14.3)            |
| Extremely stressful                       | 485 (2.4)               | 270 (2.3)               | 728 (2.7)               | 459 (2.9)               |
| Missing                                   | 85 (0.4)                | 55 (0.5)                | 102 (0.4)               | 65 (0.4)                |
| Self-rated health                         |                         |                         |                         |                         |
| Excellent                                 | 3,038 (14.8)            | 1,692 (14.3)            | 4,009 (14.7)            | 2,474 (15.5)            |

|                                               |                   |                   |                 |                   |
|-----------------------------------------------|-------------------|-------------------|-----------------|-------------------|
| Very Good                                     | 6,241 (30.4)      | 3,873 (32.8)      | 8,467 (31.1)    | 5,532 (34.7)      |
| Good                                          | 6,385 (31.1)      | 3,771 (32.0)      | 8,469 (31.1)    | 4,718 (29.6)      |
| Poor                                          | 3,376 (16.5)      | 1,752 (14.9)      | 4,521 (16.6)    | 2,275 (14.3)      |
| Fair                                          | 1,442 (7.0)       | 685 (5.8)         | 1,737 (6.4)     | 911 (5.7)         |
| Missing                                       | 24 (0.1)          | 18 (0.2)          | 30 (0.1)        | 20 (0.1)          |
| <b>Health Behaviours</b>                      |                   |                   |                 |                   |
| <b>Smoking</b>                                |                   |                   |                 |                   |
| Current smoker                                | 3,747 (18.3)      | 2,527 (21.4)      | 11,320 (41.6)   | 6,396 (40.2)      |
| Pack-years, median [IQR]                      | 40 [23.5, 55.7]   | 36.5 [22, 52.5]   | 28.8 [17.6, 47] | 27.0 [16.1, 45.3] |
| Former smoker ≥5 years                        | 9,898 (48.3)      | 5,340 (45.3)      | 7,544 (27.7)    | 4,758 (29.9)      |
| Pack-years, median [IQR]                      | 19.5 [7.2, 36.8]  | 18 [7, 35]        | 11.2 [5, 27]    | 11.0 [5.0, 26.0]  |
| Former smoker <5 years                        | 1,351 (6.6)       | 627 (5.3)         | 1,329 (4.9)     | 673 (4.2)         |
| Pack-years, median [IQR]                      | 46.9 [27.6, 61.3] | 45.5 [24.9, 59.4] | 34.1 [18, 53.1] | 33.8 [19.8, 52.9] |
| Non-smoker                                    | 3,305 (16.1)      | 1,877 (15.9)      | 3,972 (14.6)    | 2,244 (14.1)      |
| Missing                                       | 2,205 (10.8)      | 1,420 (12.0)      | 3,068 (11.3)    | 1,859 (11.7)      |
| <b>Alcohol</b>                                |                   |                   |                 |                   |
| Current drinker                               | 16,364 (79.8)     | 9,436 (80.0)      | 18,729 (68.8)   | 11,200 (70.3)     |
| Number of drinks last week, median [IQR]      | 3 [0, 8]          | 1 [0, 4]          | 3 [0, 9]        | 1 [0, 4]          |
| Former drinker <sup>c</sup>                   | 3,532 (17.2)      | 2319 (19.7)       | 6,582 (24.2)    | 4,682 (29.4)      |
| Non-drinker <sup>c</sup>                      | 545 (2.7)         | 0 (0)             | 1,856 (6.8)     | 0 (0)             |
| Missing                                       | 65 (0.3)          | 36 (0.3)          | 66 (0.2)        | 48 (0.3)          |
| <b>Diet</b>                                   |                   |                   |                 |                   |
| Fruit and vegetable consumption, median [IQR] | 4.3 [3.1, 5.7]    | 4.1 [2.8, 5.5]    | 5.0 [3.7, 6.6]  | 4.8 [3.4, 6.4]    |
| Missing                                       | 623 (3.0)         | 481 (4.1)         | 409 (1.5)       | 330 (2.1)         |
| Juice consumption, median [IQR]               | 1.0 [0.1, 1.0]    | 0.6 [0.1, 1.0]    | 1.0 [0.1, 1.0]  | 0.4 [0.0, 1.0]    |
| Missing                                       | 658 (3.2)         | 515 (4.4)         | 468 (1.7)       | 382 (2.4)         |
| Potato consumption, median [IQR]              | 0.4 [0.3, 0.9]    | 0.4 [0.1, 0.6]    | 0.4 [0.1, 0.7]  | 0.3 [0.1, 0.6]    |
| Missing                                       | 688 (3.4)         | 539 (4.6)         | 522 (1.9)       | 416 (2.6)         |
| <b>Physical Activity</b>                      |                   |                   |                 |                   |
| Daily energy expenditure (METs), median [IQR] | 1.5 [0.5, 3.0]    | 1.6 [0.6, 3.0]    | 1.1 [0.3, 2.3]  | 1.2 [0.4, 2.5]    |
| Missing                                       | 824 (4.0)         | 425 (3.6)         | 417 (1.5)       | 247 (1.6)         |
| <b>Functional Measures</b>                    |                   |                   |                 |                   |
| <b>Personal hygiene and care</b>              |                   |                   |                 |                   |
| Needs help                                    | 656 (3.2)         | 389 (3.3)         | 1,154 (4.2)     | 694 (4.4)         |
| Does not need help                            | 19,838 (96.7)     | 11,398 (96.7)     | 26,073 (95.7)   | 15,232 (95.6)     |
| Missing                                       | 12 (0.1)          | 4 (0.0)           | 6 (0.0)         | 4 (0.0)           |
| <b>Locomotion in the home</b>                 |                   |                   |                 |                   |
| Needs help                                    | 460 (2.2)         | 227 (1.9)         | 781 (2.9)       | 420 (2.6)         |
| Does not need help                            | 20,037 (97.7)     | 11,561 (98.0)     | 26,444 (97.1)   | 15,507 (97.3)     |
| Missing                                       | 9 (0.0)           | 3 (0.0)           | 8 (0.0)         | 3 (0.0)           |
| <b>Meal preparation</b>                       |                   |                   |                 |                   |
| Needs help                                    | 833 (4.1)         | 485 (4.1)         | 1,394 (5.1)     | 824 (5.2)         |
| Does not need help                            | 19,665 (95.9)     | 11,299 (95.8)     | 25,829 (94.8)   | 15,103 (94.8)     |
| Missing                                       | 8 (0.0)           | 7 (0.1)           | 10 (0.0)        | 3 (0.0)           |
| <b>Running errands</b>                        |                   |                   |                 |                   |
| Needs help                                    | 1,413 (6.9)       | 825 (7.0)         | 4,127 (15.2)    | 2,301 (14.4)      |
| Does not need help                            | 19,083 (93.1)     | 10,962 (93.0)     | 23,098 (84.8)   | 13,621 (85.5)     |
| Missing                                       | 10 (0.0)          | 4 (0.0)           | 8 (0.0)         | 8 (0.1)           |
| <b>Ordinary housework</b>                     |                   |                   |                 |                   |
| Needs help                                    | 1,704 (8.3)       | 998 (8.5)         | 4,474 (16.4)    | 2,552 (16.0)      |
| Does not need help                            | 18,784 (91.6)     | 10,780 (91.4)     | 22,746 (83.5)   | 13,368 (83.9)     |
| Missing                                       | 18 (0.1)          | 13 (0.1)          | 13 (0.0)        | 10 (0.1)          |
| <b>Finances</b>                               |                   |                   |                 |                   |
| Needs help                                    | 534 (2.6)         | 416 (3.5)         | 1,128 (4.1)     | 788 (4.9)         |
| Does not need help                            | 15,593 (76.0)     | 11,367 (96.4)     | 20,183 (74.1)   | 15,131 (95.0)     |
| Missing <sup>f</sup>                          | 4,379 (21.4)      | 8 (0.1)           | 5,922 (21.7)    | 11 (0.1)          |



|                                       |                   |                   |                   |                   |
|---------------------------------------|-------------------|-------------------|-------------------|-------------------|
| <b>Number of activities need help</b> |                   |                   |                   |                   |
| None                                  | 14272 (69.6)      | 10324 (87.6)      | 16460 (60.4)      | 12364 (77.6)      |
| 1                                     | 816 (4.0)         | 642 (5.4)         | 2227 (8.2)        | 1637 (10.3)       |
| 2                                     | 351 (1.7)         | 302 (2.6)         | 1143 (4.2)        | 827 (5.2)         |
| 3                                     | 246 (1.2)         | 192 (1.6)         | 688 (2.5)         | 474 (3.0)         |
| 4                                     | 166 (0.8)         | 128 (1.1)         | 380 (1.4)         | 285 (1.8)         |
| 5                                     | 143 (0.7)         | 92 (0.8)          | 242 (0.9)         | 180 (1.1)         |
| 6                                     | 112 (0.5)         | 87 (0.7)          | 151 (0.6)         | 131 (0.8)         |
| Missing <sup>w</sup>                  | 4400 (21.5)       | 24 (0.2)          | 5942 (21.8)       | 32 (0.2)          |
| <b>Health Conditions</b>              |                   |                   |                   |                   |
| <b>Heart disease</b>                  |                   |                   |                   |                   |
| Yes                                   | 3,876 (18.9)      | 2,133 (18.1)      | 4,022 (14.8)      | 1,982 (12.4)      |
| No                                    | 16,569 (80.8)     | 9,613 (81.5)      | 23,151 (85.0)     | 13,891 (87.2)     |
| Missing                               | 61 (0.3)          | 45 (0.4)          | 60 (0.2)          | 57 (0.4)          |
| <b>Stroke</b>                         |                   |                   |                   |                   |
| Yes                                   | 751 (3.7)         | 382 (3.2)         | 859 (3.2)         | 471 (3.0)         |
| No                                    | 19,741 (96.3)     | 11,389 (96.6)     | 26,351 (96.8)     | 15,442 (96.9)     |
| Missing                               | 14 (0.1)          | 20 (0.2)          | 23 (0.1)          | 17 (0.1)          |
| <b>Diabetes</b>                       |                   |                   |                   |                   |
| Yes                                   | 3,147 (15.3)      | 2,203 (18.7)      | 3,142 (11.5)      | 2,120 (13.3)      |
| No                                    | 17,341 (84.6)     | 9,578 (81.2)      | 24,078 (88.4)     | 13,793 (86.6)     |
| Missing                               | 18 (0.1)          | 10 (0.1)          | 13 (0.0)          | 17 (0.1)          |
| <b>Mood disorder</b>                  |                   |                   |                   |                   |
| Yes                                   | 832 (4.1)         | 754 (6.4)         | 1,816 (6.7)       | 1,581 (9.9)       |
| No                                    | 15,293 (74.6)     | 11,020 (93.5)     | 19,489 (71.6)     | 14,335 (90.0)     |
| Missing <sup>g</sup>                  | 4,381 (21.4)      | 17 (0.1)          | 5,928 (21.8)      | 14 (0.1)          |
| <b>High blood pressure</b>            |                   |                   |                   |                   |
| Yes                                   | 7,509 (36.6)      | 5,014 (42.5)      | 11,533 (42.3)     | 7,169 (45.0)      |
| No                                    | 12,950 (63.2)     | 6,751 (57.3)      | 15,671 (57.5)     | 8,737 (54.8)      |
| Missing                               | 47 (0.2)          | 26 (0.2)          | 29 (0.1)          | 24 (0.2)          |
| <b>COPD</b>                           |                   |                   |                   |                   |
| Yes                                   | 1,432 (7.0)       | 774 (6.6)         | 2,069 (7.6)       | 1,344 (8.4)       |
| No                                    | 17,430 (85.0)     | 10,999 (93.3)     | 23,035 (84.6)     | 14,544 (91.3)     |
| Missing <sup>h</sup>                  | 1,644 (8.0)       | 18 (0.2)          | 2,129 (7.8)       | 42 (0.3)          |
| <b>Epilepsy</b>                       |                   |                   |                   |                   |
| Yes                                   | 73 (0.4)          | 0 (0)             | 112 (0.4)         | 0 (0)             |
| No                                    | 14,503 (70.7)     | 0 (0)             | 19,505 (71.6)     | 0 (0)             |
| Missing <sup>i</sup>                  | 5,930 (28.9)      | 11,791 (100)      | 7,616 (28.0)      | 15,930 (100)      |
| <b>Body mass index, median [IQR]</b>  |                   |                   |                   |                   |
| Missing                               | 26.4 [24.2, 29.2] | 26.9 [24.4, 29.7] | 25.5 [22.8, 29.0] | 25.8 [23.0, 29.6] |
| Missing                               | 268 (1.3)         | 491 (4.2)         | 880 (3.2)         | 801 (5.0)         |
| <b>Design</b>                         |                   |                   |                   |                   |
| <b>Survey year</b>                    |                   |                   |                   |                   |
| 2001                                  | 4,370 (21.3)      |                   | 5,910 (21.7)      |                   |
| 2003                                  | 5,200 (25.4)      |                   | 6,932 (25.5)      |                   |
| 2005                                  | 5,009 (24.4)      |                   | 6,778 (24.9)      |                   |
| 2007/08                               | 5,927 (28.9)      |                   | 7,613 (28.0)      |                   |
| 2009/10                               |                   | 5,801 (49.2)      |                   | 7,848 (49.3)      |
| 2011/12                               |                   | 5,990 (50.8)      |                   | 8,082 (50.7)      |

Abbreviations: COPD = chronic obstructive pulmonary disease; IQR = interquartile range

<sup>a</sup> N and percentage unless otherwise specified

<sup>b</sup> Canadian Community Health Survey cycles conducted in 2000/01, 2003, 2005, and 2007/08

<sup>c</sup> Canadian Community Health Survey cycles conducted in 2009/10 and 2011/12

<sup>d</sup> Multilingualism cannot be derived in CCHS 2011/12

<sup>e</sup> In CCHS 2007/8, former drinkers can only be differentiated from non-drinkers in an optional module performed in only some regions; in 2009/10 and 2011/12, former drinkers cannot be differentiated from non-drinkers

<sup>f</sup> Needing help with finances was not collected in CCHS 2001

<sup>g</sup> Mood disorder not ascertained in CCHS 2001

<sup>h</sup> COPD was not available for survey respondents from 2007

<sup>i</sup> Epilepsy not linked in CCHS 2007/8, 2009/10 and 2011/12

**Supplementary File 3.** Male and female partial correlation plots

- Partial correlation plots show each variable's contribution to the dementia risk calculation in the presence of the other variables
- The Wald chi square statistics, used as a measure of association for each predictor and time to dementia incidence, were penalized for degrees of freedom to level the playing field among predictors with varying degrees of freedom
- See Harrell FE. *Regression Modelling Strategies with Applications to Linear Models, Logistic Regression, and Survival Analysis*. New York: Springer; 2001

Males:

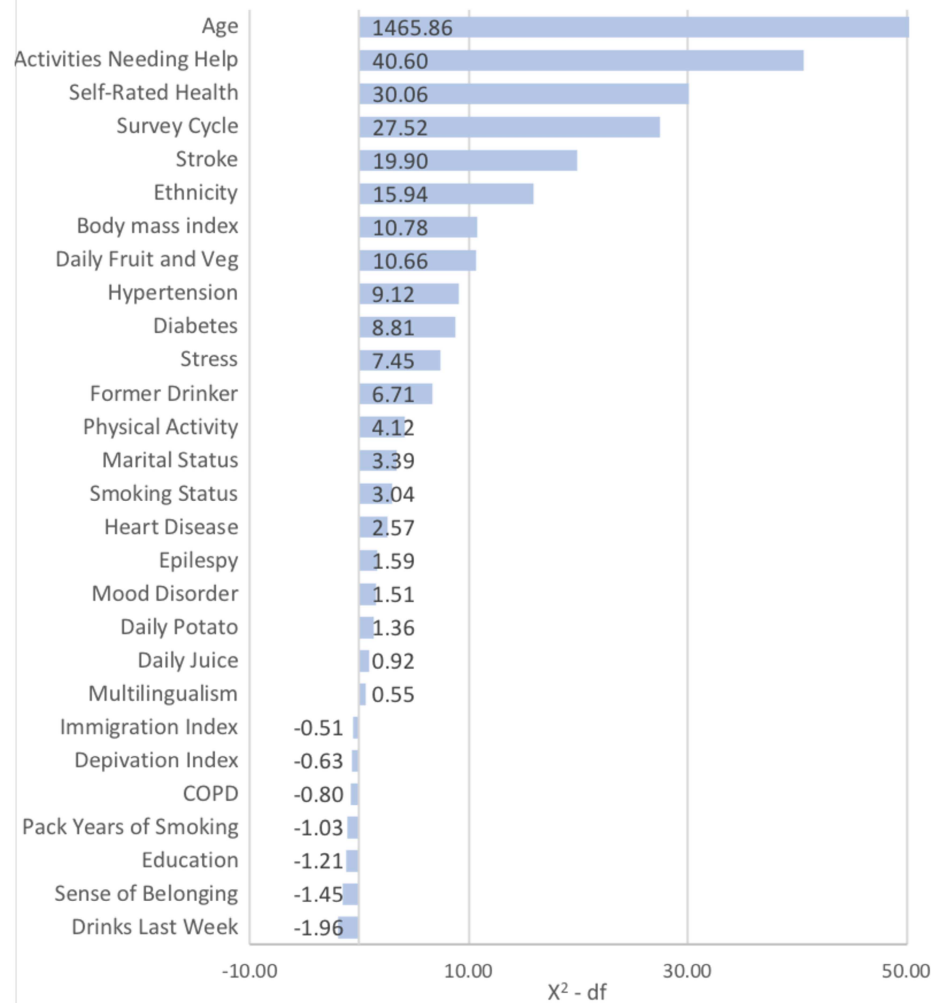

## Females:

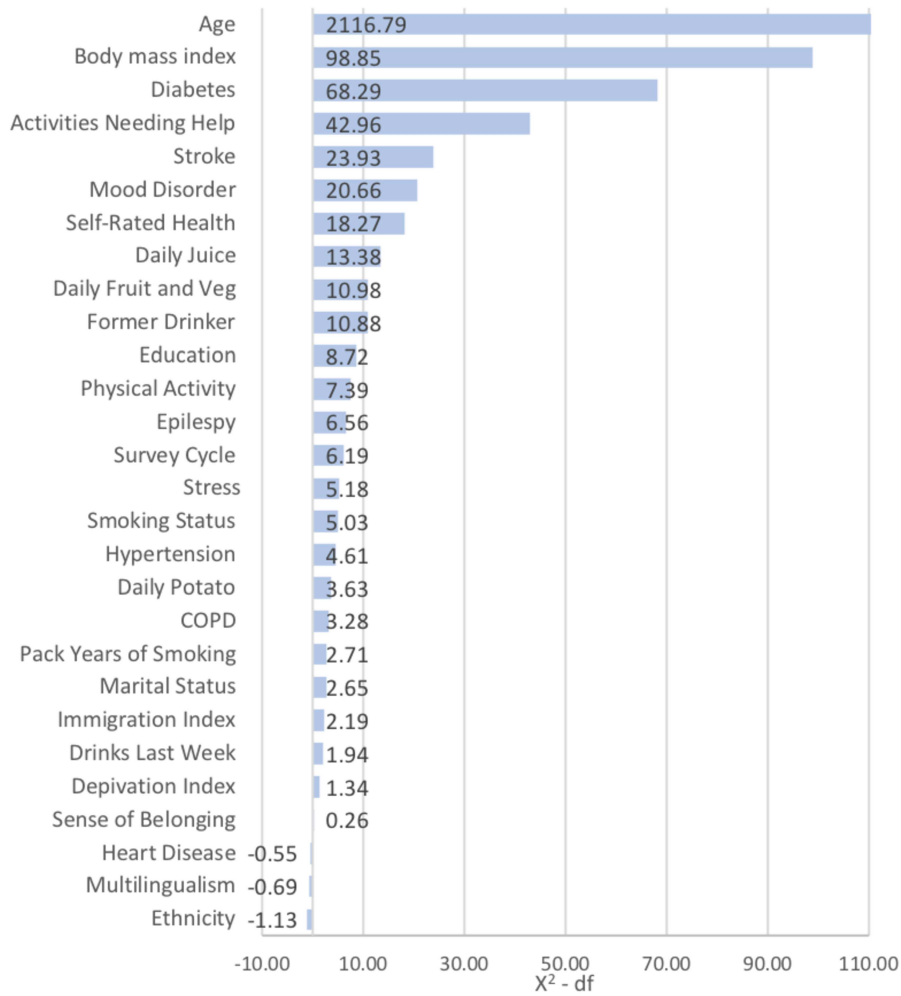

**Supplementary File 4. DemPoRT subdistribution hazard ratios for full and reduced models – males<sup>1</sup>**

| Variable               | Description                                                   | sHR (95% CI)      |                   |
|------------------------|---------------------------------------------------------------|-------------------|-------------------|
|                        |                                                               | Full Model        | Reduced Model     |
| AgeC_rcs1              | First RCS component for age                                   | 1.21 (1.11, 1.31) | 1.21 (1.11, 1.31) |
| AgeC_rcs2              | Second RCS component for age                                  | 0.81 (0.41, 1.59) | 0.80 (0.41, 1.58) |
| AgeC_rcs3              | Third RCS component for age                                   | 1.63 (0.31, 8.56) | 1.66 (0.32, 8.75) |
| AgeC_rcs4              | Fourth RCS component for age                                  | 0.54 (0.15, 1.98) | 0.53 (0.15, 1.94) |
| EthnSEAsian4C_cat      | Ethnicity: SE Asian/Chinese/Japanese/Korean/Filipino          | 0.55 (0.37, 0.81) | 0.54 (0.37, 0.80) |
| EthnOther4C_cat        | Ethnicity: Other/Multiple origin/ Unknown                     | 1.02 (0.81, 1.27) | 1.02 (0.82, 1.27) |
| EthnSWAsian4C_cat      | Ethnicity: South Asian/Arab/West Asian                        | 0.67 (0.46, 0.98) | 0.66 (0.46, 0.96) |
| ImmigrantC_cat         | Immigrant                                                     | 0.95 (0.87, 1.04) | -                 |
| EduHSGrad2C_cat        | Education: High school graduate                               | 0.99 (0.88, 1.12) | -                 |
| EduSomePS2C_cat        | Education: Some post-secondary school                         | 0.94 (0.79, 1.11) | -                 |
| EduPSGrad2C_cat        | Education: Post-secondary graduate                            | 0.95 (0.88, 1.04) | -                 |
| MSDivorcedC_cat        | Marital status: Separated/Divorced                            | 1.08 (0.94, 1.24) | -                 |
| MSWidowedC_cat         | Marital status: Widowed                                       | 0.96 (0.87, 1.07) | -                 |
| MSSingleC_cat          | Marital status: Single                                        | 0.92 (0.78, 1.08) | -                 |
| MultilingualC_cat      | Multilingual                                                  | 1.08 (1.00, 1.18) | 1.07 (0.99, 1.16) |
| DepIndModC_cat         | Deprivation: Moderate                                         | 1.02 (0.93, 1.12) | -                 |
| DepIndHighC_cat        | Deprivation: High                                             | 1.06 (0.93, 1.20) | -                 |
| BelongSomeC_cat        | Sense of Belonging: Somewhat strong                           | 1.00 (0.92, 1.09) | -                 |
| BelongSWeakC_cat       | Sense of Belonging: Somewhat weak                             | 1.08 (0.96, 1.20) | -                 |
| BelongVWeakC_cat       | Sense of Belonging: Very weak                                 | 1.06 (0.92, 1.23) | -                 |
| StressNotVeryC_cat     | Stress: Not at all stressful                                  | 0.99 (0.90, 1.09) | 0.99 (0.90, 1.09) |
| StressABitC_cat        | Stress: A bit stressful                                       | 1.13 (1.02, 1.25) | 1.13 (1.02, 1.25) |
| StressQuiteC_cat       | Stress: Quite a bit stressful                                 | 1.25 (1.08, 1.44) | 1.25 (1.09, 1.45) |
| StressExtremelyC_cat   | Stress: Extremely stressful                                   | 1.26 (0.96, 1.65) | 1.27 (0.98, 1.66) |
| SRHealthPoorC_cat      | Self-rated health: Poor                                       | 1.03 (0.90, 1.17) | 1.03 (0.91, 1.18) |
| SRHealthFairC_cat      | Self-rated health: Fair                                       | 1.18 (1.04, 1.34) | 1.19 (1.05, 1.35) |
| SRHealthGoodC_cat      | Self-rated health: Good                                       | 1.15 (0.99, 1.33) | 1.17 (1.01, 1.35) |
| SRHealthVGoodC_cat     | Self-rated health: Very good                                  | 1.09 (0.90, 1.32) | 1.11 (0.91, 1.35) |
| PackYearsC_rcs1        | First RCS component of pack years of smoking                  | 0.99 (0.99, 1.00) | 0.99 (0.99, 1.00) |
| PackYearsC_rcs2        | Second RCS component of pack years of smoking                 | 1.02 (1.00, 1.03) | 1.02 (1.00, 1.03) |
| SmokeFormer5PlusC_cat  | Smoking status: Former smoker quit $\geq 5$ years ago         | 1.04 (0.89, 1.20) | 1.04 (0.90, 1.21) |
| SmokeFormer0to5C_cat   | Smoking status: Former smoker quit $< 5$ years ago            | 0.95 (0.76, 1.17) | 0.95 (0.77, 1.18) |
| SmokeCurrentC_cat      | Smoking status: Current smoker                                | 1.08 (0.88, 1.33) | 1.10 (0.90, 1.35) |
| DrinksLastWeekC_rcs1   | First RCS component of drinks last week                       | 0.99 (0.96, 1.01) | 0.98 (0.96, 1.01) |
| DrinksLastWeekC_rcs2   | Second RCS component of drinks last week                      | 1.05 (0.90, 1.22) | 1.06 (0.91, 1.23) |
| FormerDrinkerC_cat     | Former drinker                                                | 1.13 (0.99, 1.29) | 1.14 (0.99, 1.30) |
| FruitVegC_rcs1         | First RCS component of daily fruit and vegetable consumption  | 0.94 (0.89, 1.00) | 0.94 (0.89, 0.99) |
| FruitVegC_rcs2         | Second RCS component of daily fruit and vegetable consumption | 1.07 (1.01, 1.14) | 1.08 (1.01, 1.15) |
| PotatoC_rcs1           | First RCS component of daily potato consumption               | 0.97 (0.70, 1.34) | 0.97 (0.70, 1.34) |
| PotatoC_rcs2           | Second RCS component of daily potato consumption              | 1.32 (0.84, 2.06) | 1.32 (0.85, 2.07) |
| JuiceC_rcs1            | First RCS component of daily juice consumption                | 1.02 (0.89, 1.17) | 1.02 (0.89, 1.17) |
| JuiceC_rcs2            | Second RCS component of daily juice consumption               | 1.06 (0.94, 1.19) | 1.06 (0.94, 1.18) |
| PhysicalActivityC_rcs1 | First RCS component of daily physical activity                | 0.95 (0.89, 1.01) | 0.95 (0.89, 1.01) |
| PhysicalActivityC_rcs2 | Second RCS component of daily physical activity               | 1.04 (0.96, 1.12) | 1.04 (0.97, 1.12) |

|                            |                                                                   |                   |                   |
|----------------------------|-------------------------------------------------------------------|-------------------|-------------------|
| HeartDisC_cat              | Heart disease                                                     | 0.87 (0.76, 1.00) | 0.87 (0.76, 1.00) |
| StrokeC_cat                | Stroke                                                            | 1.51 (1.20, 1.91) | 1.55 (1.23, 1.95) |
| DiabetesC_cat              | Diabetes                                                          | 1.16 (1.01, 1.32) | 1.16 (1.01, 1.32) |
| MoodC_cat                  | Mood disorder                                                     | 1.19 (0.99, 1.44) | 1.21 (1.00, 1.45) |
| HypertensionC_cat          | Hypertension                                                      | 0.92 (0.83, 1.03) | 0.92 (0.83, 1.02) |
| COPDC_cat                  | COPD                                                              | 0.91 (0.75, 1.10) | 0.91 (0.75, 1.11) |
| EpilepsyC_cat              | Epilepsy                                                          | 1.55 (0.92, 2.60) | -                 |
| BMIC_rcs1                  | First RCS component of body mass index                            | 0.98 (0.96, 1.00) | 0.98 (0.96, 1.00) |
| BMIC_rcs2                  | Second RCS component of body mass index                           | 1.01 (0.98, 1.04) | 1.01 (0.98, 1.04) |
| NeedHelp1C_cat             | Need help with one functional activity                            | 1.56 (1.29, 1.90) | 1.57 (1.29, 1.90) |
| NeedHelp2C_cat             | Need help with two functional activities                          | 1.22 (0.86, 1.73) | 1.22 (0.87, 1.73) |
| NeedHelp3C_cat             | Need help with three functional activities                        | 1.39 (0.99, 1.96) | 1.40 (0.99, 1.97) |
| NeedHelp4C_cat             | Need help with four functional activities                         | 1.61 (1.08, 2.41) | 1.61 (1.08, 2.40) |
| NeedHelp5C_cat             | Need help with five functional activities                         | 2.25 (1.55, 3.27) | 2.26 (1.56, 3.28) |
| NeedHelp6C_cat             | Need help with six functional activities                          | 1.25 (0.72, 2.17) | 1.27 (0.73, 2.20) |
| SurveyCycle2C_cat          | Survey year: 2003                                                 | 0.85 (0.76, 0.94) | 0.84 (0.76, 0.94) |
| SurveyCycle3C_cat          | Survey year: 2005                                                 | 0.88 (0.79, 0.99) | 0.88 (0.79, 0.98) |
| SurveyCycle4C_cat          | Survey year: 2007/08                                              | 0.62 (0.55, 0.70) | 0.62 (0.55, 0.70) |
| SurveyCycle5C_cat          | Survey year: 2009/10                                              | 0.66 (0.58, 0.75) | 0.65 (0.57, 0.74) |
| SurveyCycle6C_cat          | Survey year: 2011/12                                              | 0.59 (0.51, 0.68) | 0.59 (0.51, 0.68) |
| AgeCXPackYearsC_int        | Interaction between age and pack years of smoking                 | 1.00 (1.00, 1.00) | 1.00 (1.00, 1.00) |
| AgeCXSmokeFormer5PlusC_int | Interaction between age and former smoker quit $\geq 5$ years     | 0.99 (0.98, 1.01) | 0.99 (0.98, 1.01) |
| AgeCXSmokeFormer0to5C_int  | Interaction between age and former smoker quit $< 5$ years        | 0.99 (0.97, 1.02) | 0.99 (0.97, 1.02) |
| AgeCXSmokeCurrentC_int     | Interaction between age and current smoker                        | 0.99 (0.97, 1.01) | 0.99 (0.97, 1.01) |
| AgeCXDrinksLastWeekC_int   | Interaction between age and drinks last week                      | 1.00 (1.00, 1.00) | 1.00 (1.00, 1.00) |
| AgeCXFormerDrinkerC_int    | Interaction between age and former drinker                        | 1.00 (0.99, 1.01) | 1.00 (0.99, 1.01) |
| AgeCXFruitVegC_int         | Interaction between age and daily fruit and vegetable consumption | 1.00 (1.00, 1.00) | 1.00 (1.00, 1.00) |
| AgeCXJuiceC_int            | Interaction between age and daily juice consumption               | 0.99 (0.98, 1.00) | 0.99 (0.98, 1.00) |
| AgeCXPotatoC_int           | Interaction between age and daily potato consumption              | 0.99 (0.97, 1.00) | 0.99 (0.97, 1.00) |
| AgeCXPhysicalActivityC_int | Interaction between age and physical activity                     | 1.00 (1.00, 1.00) | 1.00 (1.00, 1.00) |
| AgeCXHeartDisC_int         | Interaction between age and health disease                        | 1.00 (0.99, 1.01) | 1.00 (0.99, 1.01) |
| AgeCXStrokeC_int           | Interaction between age and stroke                                | 1.00 (0.97, 1.02) | 0.99 (0.97, 1.02) |
| AgeCXDiabetesC_int         | Interaction between age and diabetes                              | 0.99 (0.98, 1.00) | 0.99 (0.98, 1.00) |
| AgeCXMoodC_int             | Interaction between age and mood disorder                         | 0.99 (0.97, 1.01) | 0.99 (0.97, 1.01) |
| AgeCXHypertensionC_int     | Interaction between age and hypertension                          | 0.99 (0.98, 1.00) | 0.99 (0.98, 1.00) |
| AgeCXCOPDC_int             | Interaction between age and COPD                                  | 0.99 (0.97, 1.01) | 0.99 (0.97, 1.01) |
| AgeCXEpilepsyC_int         | Interaction between age and epilepsy                              | 1.00 (0.93, 1.07) | -                 |
| AgeCXBMIC_int              | Interaction between age and body mass index                       | 1.00 (1.00, 1.00) | 0.98 (0.96, 1.00) |
| AgeCXNeedHelp1C_int        | Interaction between age and need help with one activity           | 0.98 (0.96, 1.00) | 0.99 (0.97, 1.02) |
| AgeCXNeedHelp2C_int        | Interaction between age and need help with two activities         | 0.99 (0.97, 1.02) | 0.99 (0.96, 1.01) |
| AgeCXNeedHelp3C_int        | Interaction between age and need help with three activities       | 0.99 (0.96, 1.01) | 0.97 (0.93, 1.00) |
| AgeCXNeedHelp4C_int        | Interaction between age and need help with four activities        | 0.96 (0.93, 1.00) | 0.96 (0.94, 0.99) |
| AgeCXNeedHelp5C_int        | Interaction between age and need help with five activities        | 0.96 (0.94, 0.99) | 0.97 (0.93, 1.01) |
| AgeCXNeedHelp6C_int        | Interaction between age and need help with six activities         | 0.97 (0.93, 1.02) | 0.98 (0.96, 1.00) |

<sup>1</sup> All variables are centered on their means

Abbreviations: CI: confidence interval; COPD= chronic obstructive pulmonary disease; RCS= restricted cubic spline; sHR= subdistribution hazard ratio

**Supplementary File 5. DemPoRT subdistribution hazard ratios for full and reduced models – females<sup>1</sup>**

| Variable               | Description                                                   | sHR (95% CI)      |                   |
|------------------------|---------------------------------------------------------------|-------------------|-------------------|
|                        |                                                               | Full Model        | Reduced Model     |
| AgeC_rcs1              | First RCS component for age                                   | 1.28 (1.20, 1.36) | 1.28 (1.20, 1.36) |
| AgeC_rcs2              | Second RCS component for age                                  | 0.55 (0.34, 0.87) | 0.55 (0.34, 0.87) |
| AgeC_rcs3              | Third RCS component for age                                   | 3.04 (1.17, 7.89) | 3.02 (1.17, 7.83) |
| AgeC_rcs4              | Fourth RCS component for age                                  | 0.43 (0.21, 0.88) | 0.43 (0.21, 0.88) |
| EthnSEAsian4C_cat      | Ethnicity: SE Asian/Chinese/Japanese/Korean/Filipino          | 0.92 (0.71, 1.19) | 1.28 (1.20, 1.36) |
| EthnOther4C_cat        | Ethnicity: Other/Multiple origin/ Unknown                     | 1.02 (0.86, 1.22) | -                 |
| EthnSWAsian4C_cat      | Ethnicity: South Asian/Arab/West Asian                        | 1.13 (0.84, 1.53) | -                 |
| ImmigrantC_cat         | Immigrant                                                     | 0.96 (0.90, 1.03) | -                 |
| EduHSGrad2C_cat        | Education: High school graduate                               | 0.94 (0.87, 1.02) | 0.94 (0.87, 1.01) |
| EduSomePS2C_cat        | Education: Some post-secondary school                         | 0.89 (0.78, 1.01) | 0.88 (0.77, 1.00) |
| EduPSGrad2C_cat        | Education: Post-secondary graduate                            | 0.90 (0.84, 0.97) | 0.90 (0.84, 0.96) |
| MSDivorcedC_cat        | Marital status: Separated/Divorced                            | 1.11 (0.99, 1.23) | 1.11 (1.00, 1.24) |
| MSWidowedC_cat         | Marital status: Widowed                                       | 1.05 (0.98, 1.13) | 1.06 (0.99, 1.13) |
| MSSingleC_cat          | Marital status: Single                                        | 1.08 (0.94, 1.25) | 1.09 (0.95, 1.26) |
| MultilingualC_cat      | Multilingual                                                  | 1.03 (0.96, 1.10) | -                 |
| DepIndModC_cat         | Deprivation: Moderate                                         | 1.01 (0.93, 1.09) | -                 |
| DepIndHighC_cat        | Deprivation: High                                             | 1.02 (0.93, 1.13) | -                 |
| BelongSomeC_cat        | Sense of Belonging: Somewhat strong                           | 0.98 (0.92, 1.05) | -                 |
| BelongSWeakC_cat       | Sense of Belonging: Somewhat weak                             | 1.05 (0.97, 1.14) | -                 |
| BelongVWeakC_cat       | Sense of Belonging: Very weak                                 | 1.04 (0.93, 1.16) | -                 |
| StressNotVeryC_cat     | Stress: Not at all stressful                                  | 0.93 (0.86, 1.00) | 0.93 (0.86, 1.00) |
| StressABitC_cat        | Stress: A bit stressful                                       | 1.01 (0.94, 1.09) | 1.02 (0.95, 1.10) |
| StressQuiteC_cat       | Stress: Quite a bit stressful                                 | 1.05 (0.95, 1.17) | 1.08 (0.97, 1.19) |
| StressExtremelyC_cat   | Stress: Extremely stressful                                   | 1.10 (0.91, 1.33) | 1.13 (0.94, 1.36) |
| SRHealthPoorC_cat      | Self-rated health: Poor                                       | 1.00 (0.90, 1.10) | -                 |
| SRHealthFairC_cat      | Self-rated health: Fair                                       | 1.00 (0.91, 1.10) | -                 |
| SRHealthGoodC_cat      | Self-rated health: Good                                       | 1.08 (0.96, 1.20) | -                 |
| SRHealthVGoodC_cat     | Self-rated health: Very good                                  | 1.07 (0.92, 1.24) | -                 |
| PackYearsC_rcs1        | First RCS component of pack years of smoking                  | 1.01 (0.99, 1.02) | 1.01 (1.00, 1.02) |
| PackYearsC_rcs2        | Second RCS component of pack years of smoking                 | 0.95 (0.88, 1.02) | 0.95 (0.88, 1.02) |
| SmokeFormer5PlusC_cat  | Smoking status: Former smoker quit ≥5 years ago               | 1.03 (0.92, 1.15) | 1.03 (0.92, 1.15) |
| SmokeFormer0to5C_cat   | Smoking status: Former smoker quit <5 years ago               | 1.04 (0.88, 1.22) | 1.04 (0.88, 1.23) |
| SmokeCurrentC_cat      | Smoking status: Current smoker                                | 1.13 (0.94, 1.35) | 1.13 (0.95, 1.36) |
| DrinksLastWeekC_rcs1   | First RCS component of drinks last week                       | 0.97 (0.94, 1.01) | 0.97 (0.93, 1.01) |
| DrinksLastWeekC_rcs2   | Second RCS component of drinks last week                      | 1.03 (0.97, 1.09) | 1.03 (0.97, 1.09) |
| FormerDrinkerC_cat     | Former drinker                                                | 1.14 (1.04, 1.25) | 1.14 (1.04, 1.25) |
| FruitVegC_rcs1         | First RCS component of daily fruit and vegetable consumption  | 0.94 (0.90, 0.97) | 0.94 (0.90, 0.97) |
| FruitVegC_rcs2         | Second RCS component of daily fruit and vegetable consumption | 1.04 (1.00, 1.08) | 1.04 (1.00, 1.09) |
| PotatoC_rcs1           | First RCS component of daily potato consumption               | 1.11 (0.87, 1.40) | 1.10 (0.87, 1.39) |
| PotatoC_rcs2           | Second RCS component of daily potato consumption              | 1.12 (0.81, 1.57) | 1.13 (0.81, 1.58) |
| JuiceC_rcs1            | First RCS component of daily juice consumption                | 1.19 (1.08, 1.30) | 1.18 (1.08, 1.30) |
| JuiceC_rcs2            | Second RCS component of daily juice consumption               | 0.96 (0.88, 1.05) | 0.96 (0.88, 1.05) |
| PhysicalActivityC_rcs1 | First RCS component of daily physical activity                | 0.96 (0.91, 1.02) | 0.95 (0.90, 1.01) |
| PhysicalActivityC_rcs2 | Second RCS component of daily physical activity               | 1.06 (0.98, 1.14) | 1.07 (0.99, 1.15) |

|                            |                                                                   |                   |                   |
|----------------------------|-------------------------------------------------------------------|-------------------|-------------------|
| HeartDisC_cat              | Heart disease                                                     | 1.06 (0.95, 1.17) | 1.07 (0.96, 1.19) |
| StrokeC_cat                | Stroke                                                            | 1.43 (1.19, 1.73) | 1.45 (1.20, 1.74) |
| DiabetesC_cat              | Diabetes                                                          | 1.49 (1.34, 1.67) | 1.51 (1.35, 1.68) |
| MoodC_cat                  | Mood disorder                                                     | 1.34 (1.19, 1.51) | 1.36 (1.20, 1.53) |
| HypertensionC_cat          | Hypertension                                                      | 0.99 (0.91, 1.08) | 1.00 (0.92, 1.08) |
| COPDC_cat                  | COPD                                                              | 0.82 (0.72, 0.95) | 0.83 (0.73, 0.96) |
| EpilepsyC_cat              | Epilepsy                                                          | 1.43 (1.01, 2.03) | 1.43 (1.01, 2.03) |
| BMIC_rcs1                  | First RCS component of body mass index                            | 0.96 (0.95, 0.97) | 0.96 (0.94, 0.97) |
| BMIC_rcs2                  | Second RCS component of body mass index                           | 1.02 (1.00, 1.04) | 1.02 (1.00, 1.04) |
| NeedHelp1C_cat             | Need help with one functional activity                            | 1.27 (1.13, 1.44) | 1.30 (1.15, 1.46) |
| NeedHelp2C_cat             | Need help with two functional activities                          | 1.45 (1.23, 1.70) | 1.48 (1.26, 1.74) |
| NeedHelp3C_cat             | Need help with three functional activities                        | 1.56 (1.28, 1.89) | 1.61 (1.33, 1.94) |
| NeedHelp4C_cat             | Need help with four functional activities                         | 1.54 (1.19, 1.98) | 1.59 (1.24, 2.05) |
| NeedHelp5C_cat             | Need help with five functional activities                         | 1.35 (0.97, 1.89) | 1.39 (1.00, 1.94) |
| NeedHelp6C_cat             | Need help with six functional activities                          | 1.82 (1.32, 2.51) | 1.87 (1.36, 2.57) |
| SurveyCycle2C_cat          | Survey year: 2003                                                 | 1.02 (0.94, 1.10) | 1.02 (0.94, 1.10) |
| SurveyCycle3C_cat          | Survey year: 2005                                                 | 0.87 (0.80, 0.95) | 0.87 (0.80, 0.94) |
| SurveyCycle4C_cat          | Survey year: 2007/08                                              | 0.80 (0.73, 0.87) | 0.79 (0.72, 0.87) |
| SurveyCycle5C_cat          | Survey year: 2009/10                                              | 0.70 (0.63, 0.77) | 0.69 (0.63, 0.77) |
| SurveyCycle6C_cat          | Survey year: 2011/12                                              | 0.63 (0.56, 0.71) | 0.63 (0.56, 0.70) |
| AgeCXPackYearsC_int        | Interaction between age and pack years of smoking                 | 1.00 (1.00, 1.00) | 1.00 (1.00, 1.00) |
| AgeCXSmokeFormer5PlusC_int | Interaction between age and former smoker quit $\geq 5$ years     | 1.00 (0.99, 1.01) | 1.00 (0.99, 1.01) |
| AgeCXSmokeFormer0to5C_int  | Interaction between age and former smoker quit $< 5$ years        | 0.99 (0.98, 1.01) | 0.99 (0.98, 1.01) |
| AgeCXSmokeCurrentC_int     | Interaction between age and current smoker                        | 0.99 (0.97, 1.00) | 0.99 (0.97, 1.00) |
| AgeCXDrinksLastWeekC_int   | Interaction between age and drinks last week                      | 1.00 (1.00, 1.00) | 1.00 (1.00, 1.00) |
| AgeCXFormerDrinkerC_int    | Interaction between age and former drinker                        | 0.99 (0.99, 1.00) | 0.99 (0.99, 1.00) |
| AgeCXFruitVegC_int         | Interaction between age and daily fruit and vegetable consumption | 1.00 (1.00, 1.00) | 1.00 (1.00, 1.00) |
| AgeCXJuiceC_int            | Interaction between age and daily juice consumption               | 0.99 (0.99, 1.00) | 0.99 (0.99, 1.00) |
| AgeCXPotatoC_int           | Interaction between age and daily potato consumption              | 0.99 (0.98, 1.00) | 0.99 (0.98, 1.00) |
| AgeCXPhysicalActivityC_int | Interaction between age and physical activity                     | 1.00 (1.00, 1.00) | 1.00 (1.00, 1.00) |
| AgeCXHeartDisC_int         | Interaction between age and health disease                        | 0.98 (0.97, 0.99) | 0.98 (0.97, 0.99) |
| AgeCXStrokeC_int           | Interaction between age and stroke                                | 1.00 (0.98, 1.02) | 1.00 (0.98, 1.02) |
| AgeCXDiabetesC_int         | Interaction between age and diabetes                              | 0.98 (0.96, 0.99) | 0.98 (0.96, 0.99) |
| AgeCXMoodC_int             | Interaction between age and mood disorder                         | 1.00 (0.98, 1.01) | 1.00 (0.98, 1.01) |
| AgeCXHypertensionC_int     | Interaction between age and hypertension                          | 0.99 (0.98, 0.99) | 0.99 (0.98, 0.99) |
| AgeCXCOPDC_int             | Interaction between age and COPD                                  | 0.99 (0.98, 1.01) | 0.99 (0.98, 1.01) |
| AgeCXEpilepsyC_int         | Interaction between age and epilepsy                              | 0.97 (0.93, 1.00) | 0.97 (0.93, 1.00) |
| AgeCXBMIC_int              | Interaction between age and body mass index                       | 1.00 (1.00, 1.00) | 1.00 (1.00, 1.00) |
| AgeCXNeedHelp1C_int        | Interaction between age and need help with one activity           | 0.98 (0.97, 0.99) | 0.98 (0.97, 0.99) |
| AgeCXNeedHelp2C_int        | Interaction between age and need help with two activities         | 0.98 (0.97, 1.00) | 0.98 (0.97, 1.00) |
| AgeCXNeedHelp3C_int        | Interaction between age and need help with three activities       | 0.96 (0.95, 0.98) | 0.96 (0.95, 0.98) |
| AgeCXNeedHelp4C_int        | Interaction between age and need help with four activities        | 0.98 (0.96, 0.99) | 0.97 (0.96, 0.99) |
| AgeCXNeedHelp5C_int        | Interaction between age and need help with five activities        | 0.98 (0.95, 1.00) | 0.98 (0.95, 1.00) |
| AgeCXNeedHelp6C_int        | Interaction between age and need help with six activities         | 0.94 (0.92, 0.96) | 0.94 (0.92, 0.96) |

<sup>1</sup> All variables are centered on their means

Abbreviations: CI: confidence interval; COPD= chronic obstructive pulmonary disease; RCS= restricted cubic spline; sHR= subdistribution hazard ratio



**Supplementary File 6.** DemPoRT reduced male and female formulas for risk**DemPoRT formula for 5-year risk of dementia:**

$$5 \text{ year dementia risk} = 1 - \exp(- (h_0(5 \text{ years}) * \exp(\text{Score})))$$

**5 year baseline hazards:**

$$h_0(5 \text{ years})_{\text{male}} = 0.03026372$$

$$h_0(5 \text{ years})_{\text{female}} = 0.08718073$$

**Beta coefficients:**

Available at <https://github.com/Big-Life-Lab/DemPoRT>

**Male DemPoRT risk score:**

$$\begin{aligned} \text{Score}_{\text{male}} = & (\beta_{\text{AgeC\_rcs1}} * \text{AgeC\_rcs1}) + (\beta_{\text{AgeC\_rcs2}} * \text{AgeC\_rcs2}) + (\beta_{\text{AgeC\_rcs3}} * \text{AgeC\_rcs3}) + (\beta_{\text{AgeC\_rcs4}} * \\ & \text{AgeC\_rcs4}) + (\beta_{\text{EthnSEAsian4C\_cat}} * \text{EthnSEAsian4C\_cat}) + (\beta_{\text{EthnOther4C\_cat}} * \text{EthnOther4C\_cat}) \\ & + (\beta_{\text{EthnSWAsian4C\_cat}} * \text{EthnSWAsian4C\_cat}) + (\beta_{\text{MultilingualC\_cat}} * \text{MultilingualC\_cat}) + \\ & (\beta_{\text{StressNotVeryC\_cat}} * \text{StressNotVeryC\_cat}) + (\beta_{\text{StressABitC\_cat}} * \text{StressABitC\_cat}) + (\beta_{\text{StressQuiteC\_cat}} * \\ & \text{StressQuiteC\_cat}) + (\beta_{\text{StressExtremelyC\_cat}} * \text{StressExtremelyC\_cat}) + (\beta_{\text{SRHealthPoorC\_cat}} * \\ & \text{SRHealthPoorC\_cat}) + (\beta_{\text{SRHealthFairC\_cat}} * \text{SRHealthFairC\_cat}) + (\beta_{\text{SRHealthGoodC\_cat}} * \\ & \text{SRHealthGoodC\_cat}) + (\beta_{\text{SRHealthVGoodC\_cat}} * \text{SRHealthVGoodC\_cat}) + (\beta_{\text{PackYearsC\_rcs1}} * \\ & \text{PackYearsC\_rcs1}) + (\beta_{\text{PackYearsC\_rcs2}} * \text{PackYearsC\_rcs2}) + (\beta_{\text{SmokeFormer5PlusC\_cat}} * \\ & \text{SmokeFormer5PlusC\_cat}) + (\beta_{\text{SmokeFormer0to5C\_cat}} * \text{SmokeFormer0to5C\_cat}) + \\ & (\beta_{\text{SmokeCurrentC\_cat}} * \text{SmokeCurrentC\_cat}) + (\beta_{\text{DrinksLastWeekC\_rcs1}} * \text{DrinksLastWeekC\_rcs1}) + \\ & (\beta_{\text{DrinksLastWeekC\_rcs2}} * \text{DrinksLastWeekC\_rcs2}) + (\beta_{\text{FormerDrinkerC\_cat}} * \text{FormerDrinkerC\_cat}) + \\ & (\beta_{\text{FruitVegC\_rcs1}} * \text{FruitVegC\_rcs1}) + (\beta_{\text{FruitVegC\_rcs2}} * \text{FruitVegC\_rcs2}) + (\beta_{\text{PotatoC\_rcs1}} * \\ & \text{PotatoC\_rcs1}) + (\beta_{\text{PotatoC\_rcs2}} * \text{PotatoC\_rcs2}) + (\beta_{\text{JuiceC\_rcs1}} * \text{JuiceC\_rcs1}) + (\beta_{\text{JuiceC\_rcs2}} * \\ & \text{JuiceC\_rcs2}) + (\beta_{\text{PhysicalActivityC\_rcs1}} * \text{PhysicalActivityC\_rcs1}) + (\beta_{\text{PhysicalActivityC\_rcs2}} * \\ & \text{PhysicalActivityC\_rcs2}) + (\beta_{\text{HeartDisC\_cat}} * \text{HeartDisC\_cat}) + (\beta_{\text{StrokeC\_cat}} * \text{StrokeC\_cat}) + \\ & (\beta_{\text{DiabetesC\_cat}} * \text{DiabetesC\_cat}) + (\beta_{\text{MoodC\_cat}} * \text{MoodC\_cat}) + (\beta_{\text{HypertensionC\_cat}} * \\ & \text{HypertensionC\_cat}) + (\beta_{\text{COPDC\_cat}} * \text{COPDC\_cat}) + (\beta_{\text{BMIC\_rcs1}} * \text{BMIC\_rcs1}) + (\beta_{\text{BMIC\_rcs2}} * \\ & \text{BMIC\_rcs2}) + (\beta_{\text{NeedHelp1C\_cat}} * \text{NeedHelp1C\_cat}) + (\beta_{\text{NeedHelp2C\_cat}} * \text{NeedHelp2C\_cat}) + \\ & (\beta_{\text{NeedHelp3C\_cat}} * \text{NeedHelp3C\_cat}) + (\beta_{\text{NeedHelp4C\_cat}} * \text{NeedHelp4C\_cat}) + (\beta_{\text{NeedHelp5C\_cat}} * \\ & \text{NeedHelp5C\_cat}) + (\beta_{\text{NeedHelp6C\_cat}} * \text{NeedHelp6C\_cat}) + (\beta_{\text{SurveyCycle2C\_cat}} * \\ & \text{SurveyCycle2C\_cat}) + (\beta_{\text{SurveyCycle3C\_cat}} * \text{SurveyCycle3C\_cat}) + (\beta_{\text{SurveyCycle4C\_cat}} * \\ & \text{SurveyCycle4C\_cat}) + (\beta_{\text{SurveyCycle5C\_cat}} * \text{SurveyCycle5C\_cat}) + (\beta_{\text{SurveyCycle6C\_cat}} * \\ & \text{SurveyCycle6C\_cat}) + (\beta_{\text{AgeCXPackYearsC\_int}} * \text{AgeCXPackYearsC\_int}) + \\ & (\beta_{\text{AgeCXSmokeFormer5PlusC\_int}} * \text{AgeCXSmokeFormer5PlusC\_int}) + (\beta_{\text{AgeCXSmokeFormer0to5C\_int}} * \\ & \text{AgeCXSmokeFormer0to5C\_int}) + (\beta_{\text{AgeCXSmokeCurrentC\_int}} * \text{AgeCXSmokeCurrentC\_int}) + \\ & + (\beta_{\text{AgeCXDrinksLastWeekC\_int}} * \text{AgeCXDrinksLastWeekC\_int}) + (\beta_{\text{AgeCXFruitVegC\_int}} * \\ & \text{AgeCXFruitVegC\_int}) + (\beta_{\text{AgeCXPotatoC\_int}} * \text{AgeCXPotatoC\_int}) + (\beta_{\text{AgeCXJuiceC\_int}} * \\ & \text{AgeCXJuiceC\_int}) + (\beta_{\text{AgeCXPhysicalActivityC\_int}} * \text{AgeCXPhysicalActivityC\_int}) + \\ & (\beta_{\text{AgeCXHeartDisC\_int}} * \text{AgeCXHeartDisC\_int}) + (\beta_{\text{AgeCXStrokeC\_int}} * \text{AgeCXStrokeC\_int}) + \\ & (\beta_{\text{AgeCXDiabetesC\_int}} * \text{AgeCXDiabetesC\_int}) + (\beta_{\text{AgeCXMoodC\_int}} * \text{AgeCXMoodC\_int}) + \end{aligned}$$



$$\begin{aligned}
 & (\beta_{\text{AgeCXHypertensionC\_int}} * \text{AgeCXHypertensionC\_int}) + (\beta_{\text{AgeCXCOPDC\_int}} * \text{AgeCXCOPDC\_int}) + \\
 & (\beta_{\text{AgeCXBMIC\_int}} * \text{AgeCXBMIC\_int}) + (\beta_{\text{AgeCXNeedHelp1C\_int}} * \text{AgeCXNeedHelp1C\_int}) + \\
 & (\beta_{\text{AgeCXNeedHelp2C\_int}} * \text{AgeCXNeedHelp2C\_int}) + (\beta_{\text{AgeCXNeedHelp3C\_int}} * \\
 & \text{AgeCXNeedHelp3C\_int}) + (\beta_{\text{AgeCXNeedHelp4C\_int}} * \text{AgeCXNeedHelp4C\_int}) + \\
 & (\beta_{\text{AgeCXNeedHelp5C\_int}} * \text{AgeCXNeedHelp5C\_int}) + (\beta_{\text{AgeCXNeedHelp6C\_int}} * \\
 & \text{AgeCXNeedHelp6C\_int})
 \end{aligned}$$

**Female DemPoRT risk score:**

*Score<sub>female</sub>* =

$$\begin{aligned}
 & (\beta_{\text{AgeC\_rcs1}} * \text{AgeC\_rcs1}) + (\beta_{\text{AgeC\_rcs2}} * \text{AgeC\_rcs2}) + (\beta_{\text{AgeC\_rcs3}} * \text{AgeC\_rcs3}) + (\beta_{\text{AgeC\_rcs4}} * \\
 & \text{AgeC\_rcs4}) + (\beta_{\text{EduHSGrad2C\_cat}} * \text{EduHSGrad2C\_cat}) + (\beta_{\text{EduSomePS2C\_cat}} * \\
 & \text{EduSomePS2C\_cat}) + (\beta_{\text{EduPSGrad2C\_cat}} * \text{EduPSGrad2C\_cat}) + (\beta_{\text{MSDivorcedC\_cat}} * \\
 & \text{MSDivorcedC\_cat}) + (\beta_{\text{MSWidowedC\_cat}} * \text{MSWidowedC\_cat}) + (\beta_{\text{MSSingleC\_cat}} * \\
 & \text{MSSingleC\_cat}) + (\beta_{\text{StressNotVeryC\_cat}} * \text{StressNotVeryC\_cat}) + (\beta_{\text{StressABitC\_cat}} * \\
 & \text{StressABitC\_cat}) + (\beta_{\text{StressQuiteC\_cat}} * \text{StressQuiteC\_cat}) + (\beta_{\text{StressExtreamlyC\_cat}} * \\
 & \text{StressExtreamlyC\_cat}) + (\beta_{\text{PackYearsC\_rcs1}} * \text{PackYearsC\_rcs1}) + (\beta_{\text{PackYearsC\_rcs2}} * \\
 & \text{PackYearsC\_rcs2}) + (\beta_{\text{SmokeFormer5PlusC\_cat}} * \text{SmokeFormer5PlusC\_cat}) + (\beta_{\text{SmokeFormer0to5C\_cat}} * \\
 & \text{SmokeFormer0to5C\_cat}) + (\beta_{\text{SmokeCurrentC\_cat}} * \text{SmokeCurrentC\_cat}) + (\beta_{\text{DrinksLastWeekC\_rcs1}} * \\
 & \text{DrinksLastWeekC\_rcs1}) + (\beta_{\text{DrinksLastWeekC\_rcs2}} * \text{DrinksLastWeekC\_rcs2}) + (\beta_{\text{FormerDrinkerC\_cat}} * \\
 & \text{FormerDrinkerC\_cat}) + (\beta_{\text{FruitVegC\_rcs1}} * \text{FruitVegC\_rcs1}) + (\beta_{\text{FruitVegC\_rcs2}} * \text{FruitVegC\_rcs2}) \\
 & + (\beta_{\text{PotatoC\_rcs1}} * \text{PotatoC\_rcs1}) + (\beta_{\text{PotatoC\_rcs2}} * \text{PotatoC\_rcs2}) + (\beta_{\text{JuiceC\_rcs1}} * \text{JuiceC\_rcs1}) + \\
 & (\beta_{\text{JuiceC\_rcs2}} * \text{JuiceC\_rcs2}) + (\beta_{\text{PhysicalActivityC\_rcs1}} * \text{PhysicalActivityC\_rcs1}) + (\beta_{\text{PhysicalActivityC\_rcs2}} * \\
 & \text{PhysicalActivityC\_rcs2}) + (\beta_{\text{HeartDisC\_cat}} * \text{HeartDisC\_cat}) + (\beta_{\text{StrokeC\_cat}} * \text{StrokeC\_cat}) + \\
 & (\beta_{\text{DiabetesC\_cat}} * \text{DiabetesC\_cat}) + (\beta_{\text{MoodC\_cat}} * \text{MoodC\_cat}) + (\beta_{\text{HypertensionC\_cat}} * \\
 & \text{HypertensionC\_cat}) + (\beta_{\text{COPDC\_cat}} * \text{COPDC\_cat}) + (\beta_{\text{EpilepsyC\_cat}} * \text{EpilepsyC\_cat}) + \\
 & (\beta_{\text{BMIC\_rcs1}} * \text{BMIC\_rcs1}) + (\beta_{\text{BMIC\_rcs2}} * \text{BMIC\_rcs2}) + (\beta_{\text{NeedHelp1C\_cat}} * \text{NeedHelp1C\_cat}) + \\
 & (\beta_{\text{NeedHelp2C\_cat}} * \text{NeedHelp2C\_cat}) + (\beta_{\text{NeedHelp3C\_cat}} * \text{NeedHelp3C\_cat}) + (\beta_{\text{NeedHelp4C\_cat}} * \\
 & \text{NeedHelp4C\_cat}) + (\beta_{\text{NeedHelp5C\_cat}} * \text{NeedHelp5C\_cat}) + (\beta_{\text{NeedHelp6C\_cat}} * \text{NeedHelp6C\_cat}) \\
 & + (\beta_{\text{SurveyCycle2C\_cat}} * \text{SurveyCycle2C\_cat}) + (\beta_{\text{SurveyCycle3C\_cat}} * \text{SurveyCycle3C\_cat}) + \\
 & (\beta_{\text{SurveyCycle4C\_cat}} * \text{SurveyCycle4C\_cat}) + (\beta_{\text{SurveyCycle5C\_cat}} * \text{SurveyCycle5C\_cat}) + \\
 & (\beta_{\text{SurveyCycle6C\_cat}} * \text{SurveyCycle6C\_cat}) + (\beta_{\text{AgeCXPackYearsC\_int}} * \text{AgeCXPackYearsC\_int}) + \\
 & (\beta_{\text{AgeCXSmokeFormer5PlusC\_int}} * \text{AgeCXSmokeFormer5PlusC\_int}) + (\beta_{\text{AgeCXSmokeFormer0to5C\_int}} * \\
 & \text{AgeCXSmokeFormer0to5C\_int}) + (\beta_{\text{AgeCXSmokeCurrentC\_int}} * \text{AgeCXSmokeCurrentC\_int}) + \\
 & (\beta_{\text{AgeCXDrinksLastWeekC\_int}} * \text{AgeCXDrinksLastWeekC\_int}) + (\beta_{\text{AgeCXFruitVegC\_int}} * \\
 & \text{AgeCXFruitVegC\_int}) + (\beta_{\text{AgeCXPotatoC\_int}} * \text{AgeCXPotatoC\_int}) + (\beta_{\text{AgeCXJuiceC\_int}} * \\
 & \text{AgeCXJuiceC\_int}) + (\beta_{\text{AgeCXPhysicalActivityC\_int}} * \text{AgeCXPhysicalActivityC\_int}) + \\
 & (\beta_{\text{AgeCXHeartDisC\_int}} * \text{AgeCXHeartDisC\_int}) + (\beta_{\text{AgeCXStrokeC\_int}} * \text{AgeCXStrokeC\_int}) + \\
 & (\beta_{\text{AgeCXDiabetesC\_int}} * \text{AgeCXDiabetesC\_int}) + (\beta_{\text{AgeCXMoodC\_int}} * \text{AgeCXMoodC\_int}) + \\
 & (\beta_{\text{AgeCXHypertensionC\_int}} * \text{AgeCXHypertensionC\_int}) + (\beta_{\text{AgeCXCOPDC\_int}} * \text{AgeCXCOPDC\_int}) + \\
 & (\beta_{\text{AgeCXEpilepsyC\_int}} * \text{AgeCXEpilepsyC\_int}) + (\beta_{\text{AgeCXBMIC\_int}} * \text{AgeCXBMIC\_int}) + \\
 & (\beta_{\text{AgeCXNeedHelp1C\_int}} * \text{AgeCXNeedHelp1C\_int}) + (\beta_{\text{AgeCXNeedHelp2C\_int}} * \\
 & \text{AgeCXNeedHelp2C\_int}) + (\beta_{\text{AgeCXNeedHelp3C\_int}} * \text{AgeCXNeedHelp3C\_int}) + \\
 & (\beta_{\text{AgeCXNeedHelp4C\_int}} * \text{AgeCXNeedHelp4C\_int}) + (\beta_{\text{AgeCXNeedHelp5C\_int}} * \\
 & \text{AgeCXNeedHelp5C\_int}) + (\beta_{\text{AgeCXNeedHelp6C\_int}} * \text{AgeCXNeedHelp6C\_int})
 \end{aligned}$$

**Components of restricted cubic spline with  $j = 1 \dots k$  knots:**

$$X_{\text{rcs}1} = X$$

$$X_{\text{rcs}_{j+1}} = \left( \frac{(X - \text{knot}_j)}{(\text{knot}_k - \text{knot}_1)^{2/3}} \right)_+^3 + (\text{knot}_{k-1} - \text{knot}_j) \left( \frac{(X - \text{knot}_k)}{(\text{knot}_k - \text{knot}_1)^{2/3}} \right)_+^3 - (\text{knot}_k - \text{knot}_j) \left( \frac{X - \text{knot}_{k-1}}{(\text{knot}_k - \text{knot}_1)^{2/3}} \right)_+^3 / (\text{knot}_k - \text{knot}_{k-1})$$

Where:

$$\begin{aligned} (X - \text{knot})_+ &= X - \text{knot}, & X - \text{knot} > 0 \\ &= 0, & X - \text{knot} \leq 0 \end{aligned}$$

(ref: <http://biostat.mc.vanderbilt.edu/wiki/pub/Main/SasMacros/survrisk.txt>)

**Supplementary File 7.** Observed versus predicted for subgroups in the validation model – males

- Light patterned bars indicate less than 5% dementia prevalence within the subgroup
- Asterisk indicates that observed and predicted risks are more than 20% different; only evaluated within subgroups with at least 5% dementia prevalence

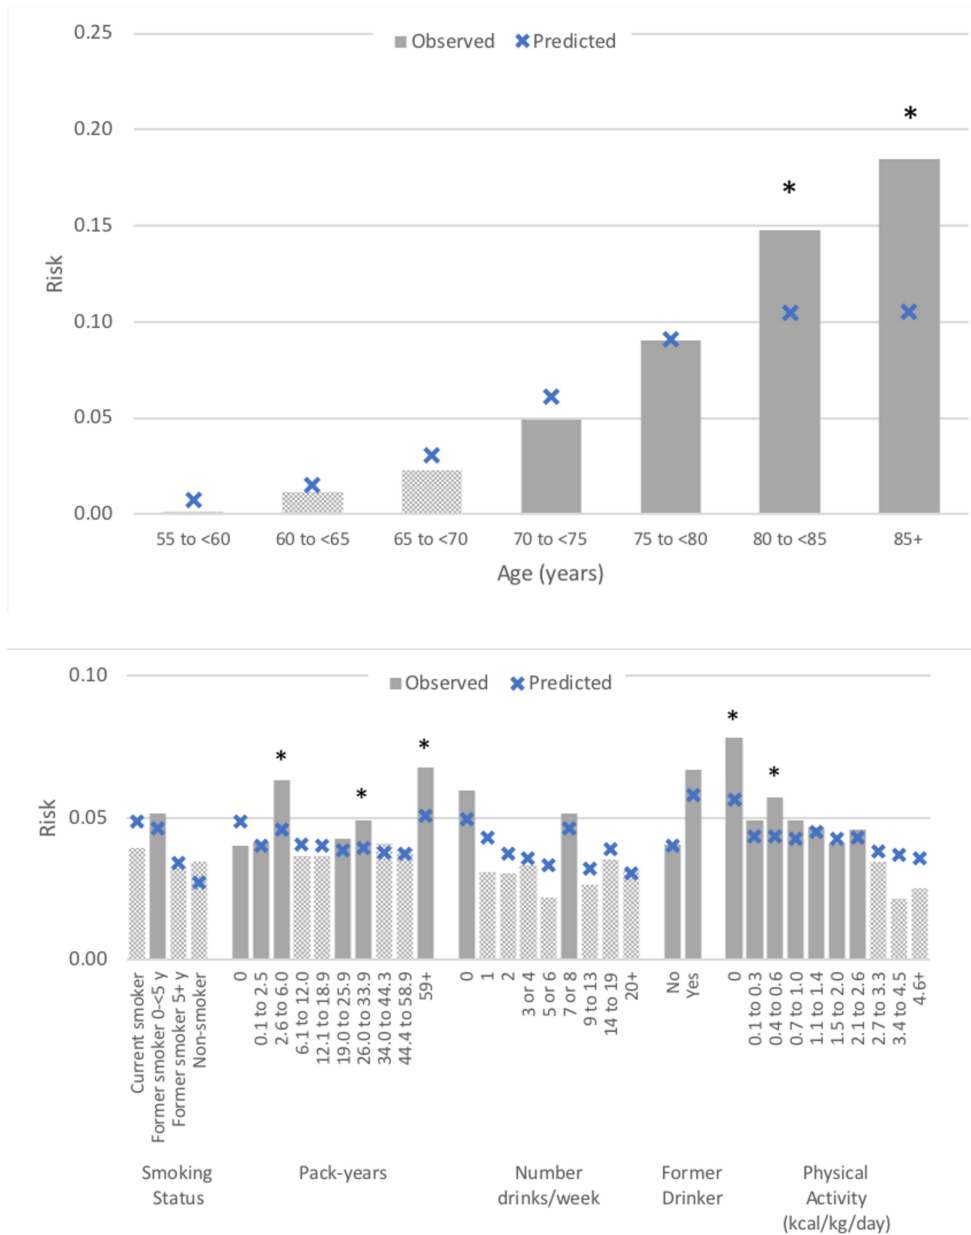

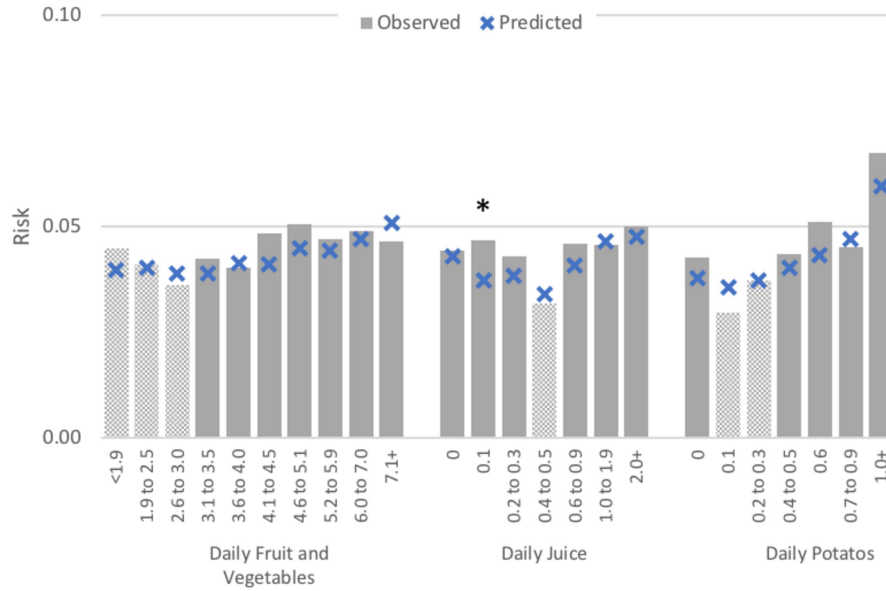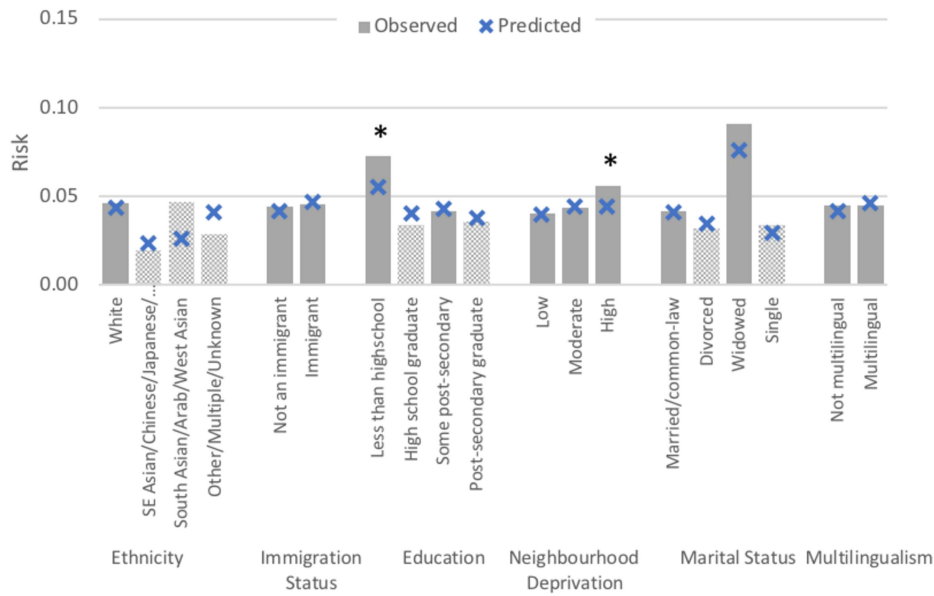

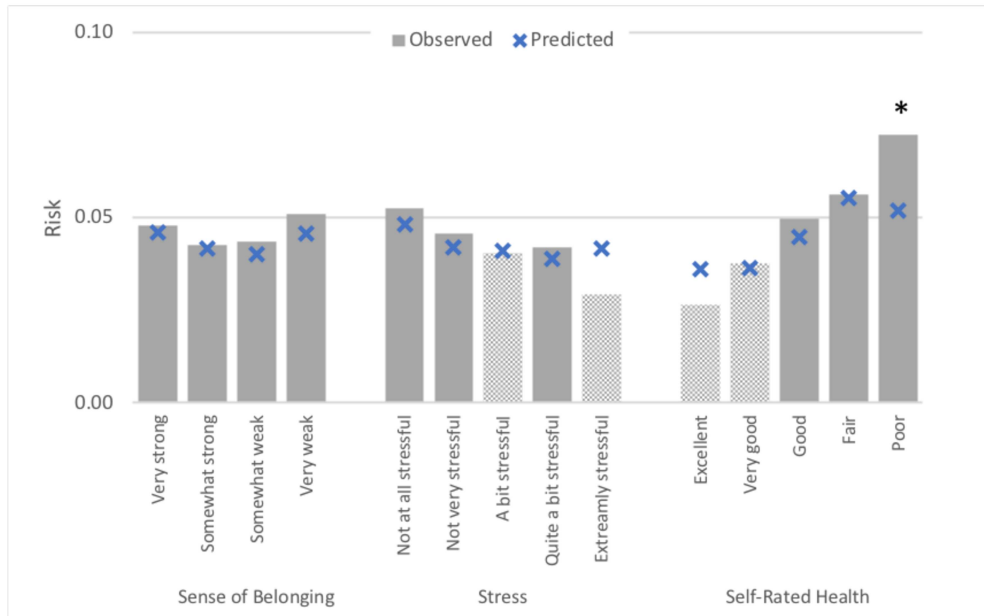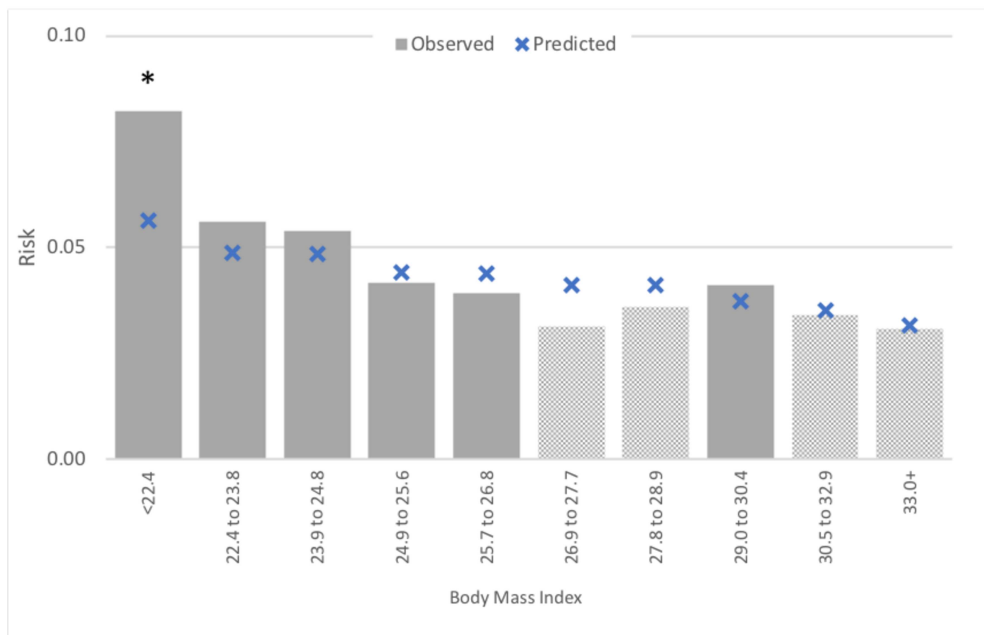

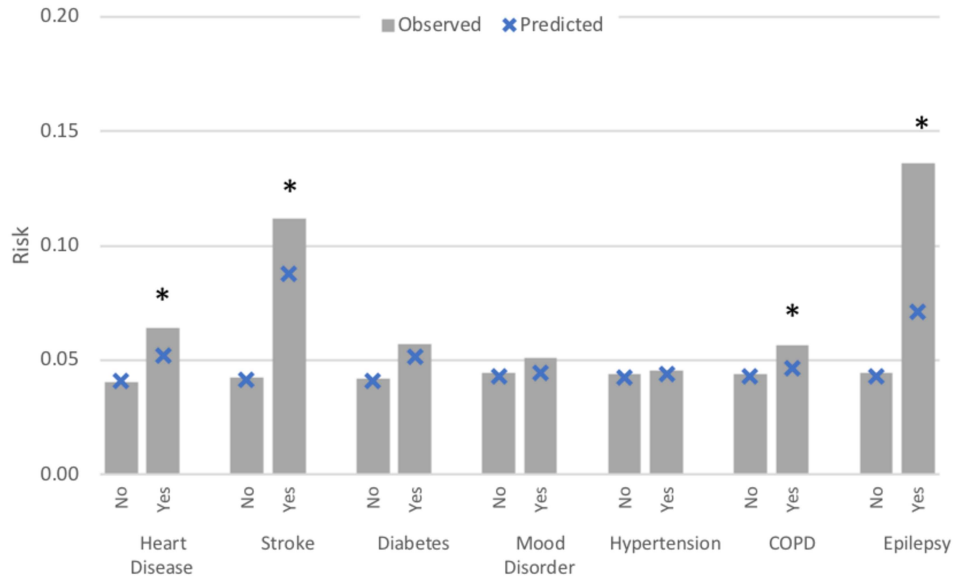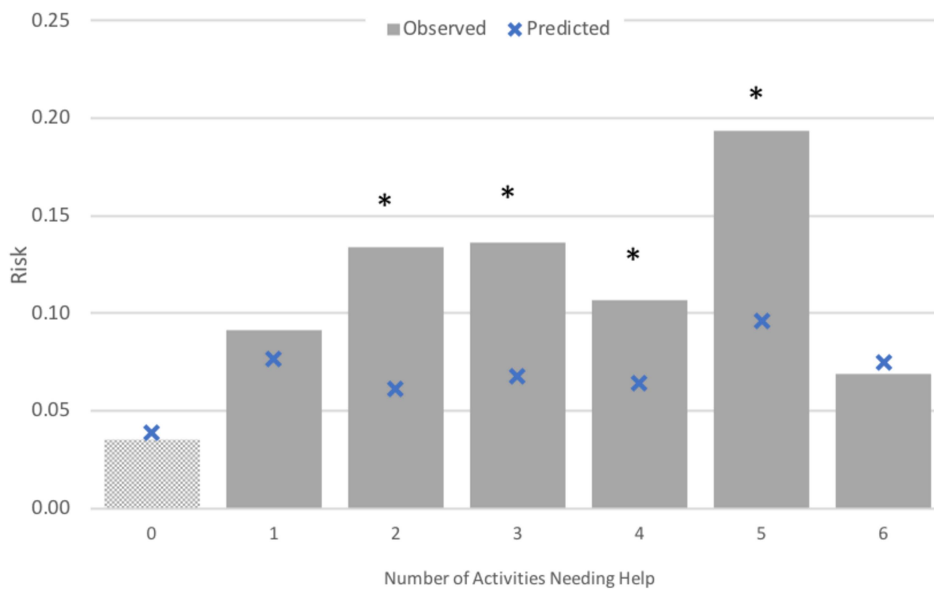

**Supplementary File 8.** Observed versus predicted for subgroups in the validation model – females

- Light patterned bars indicate less than 5% dementia prevalence within the subgroup
- Asterisk indicates that observed and predicted risks are more than 20% different; only evaluated within subgroups with at least 5% dementia prevalence

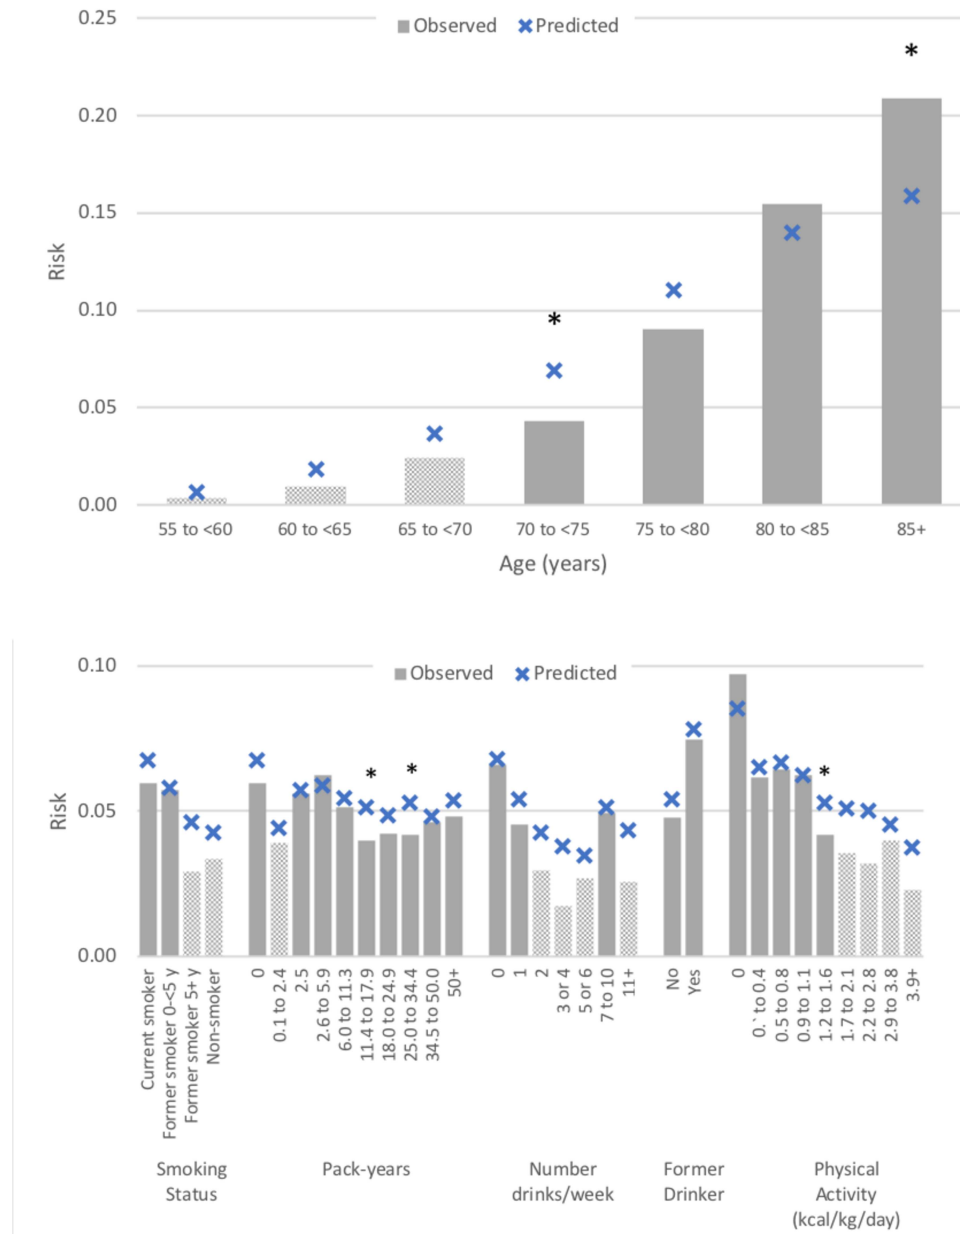

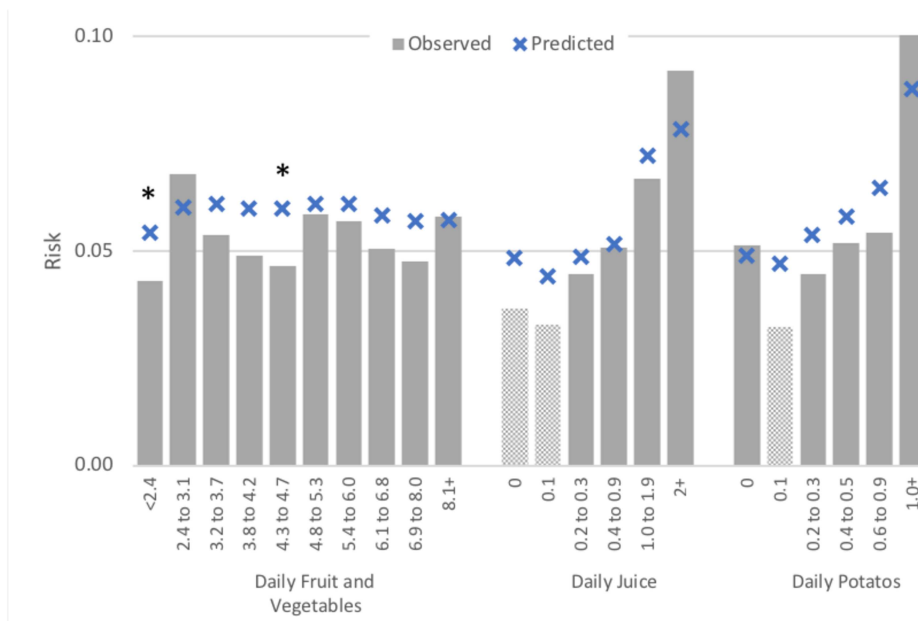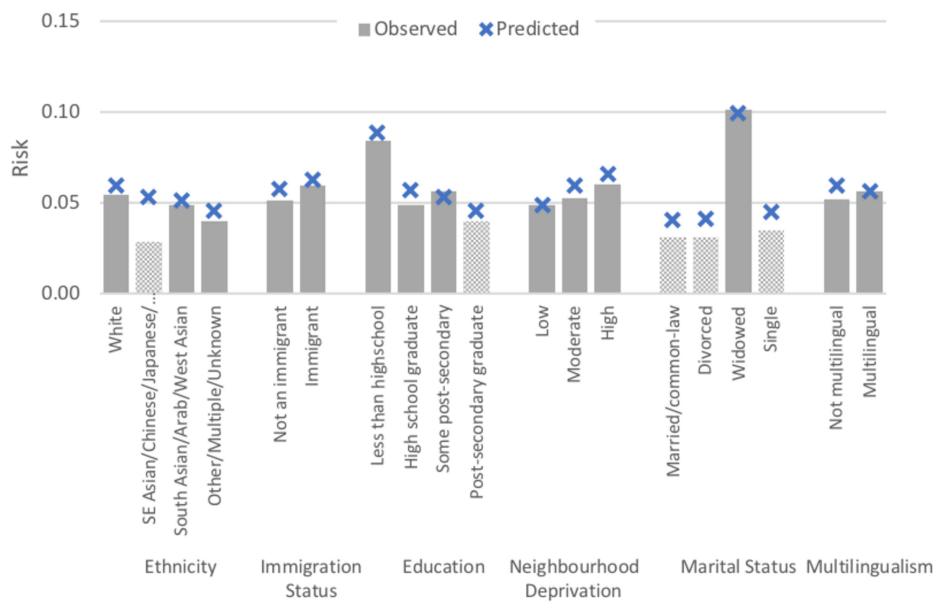



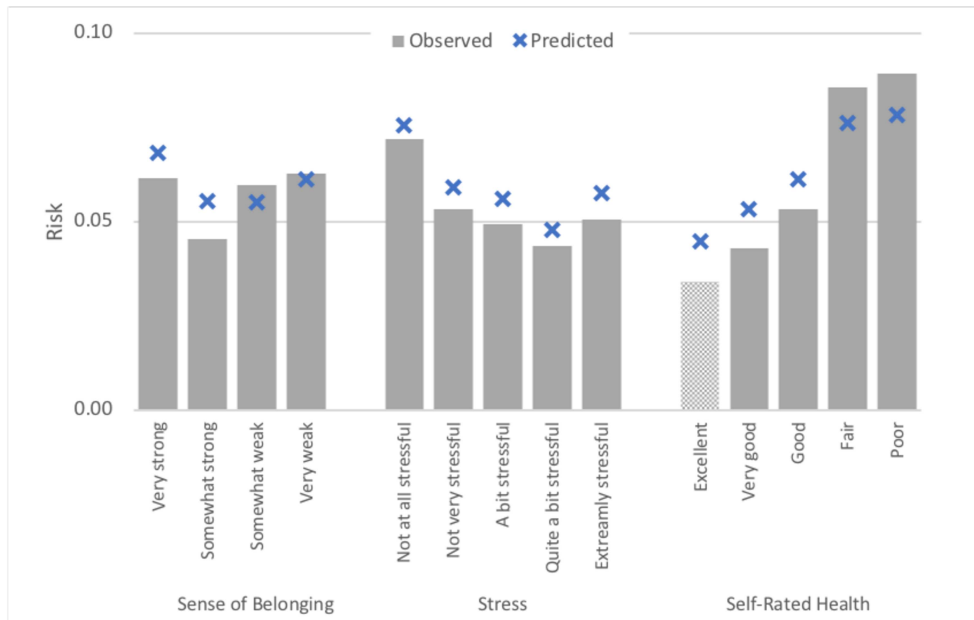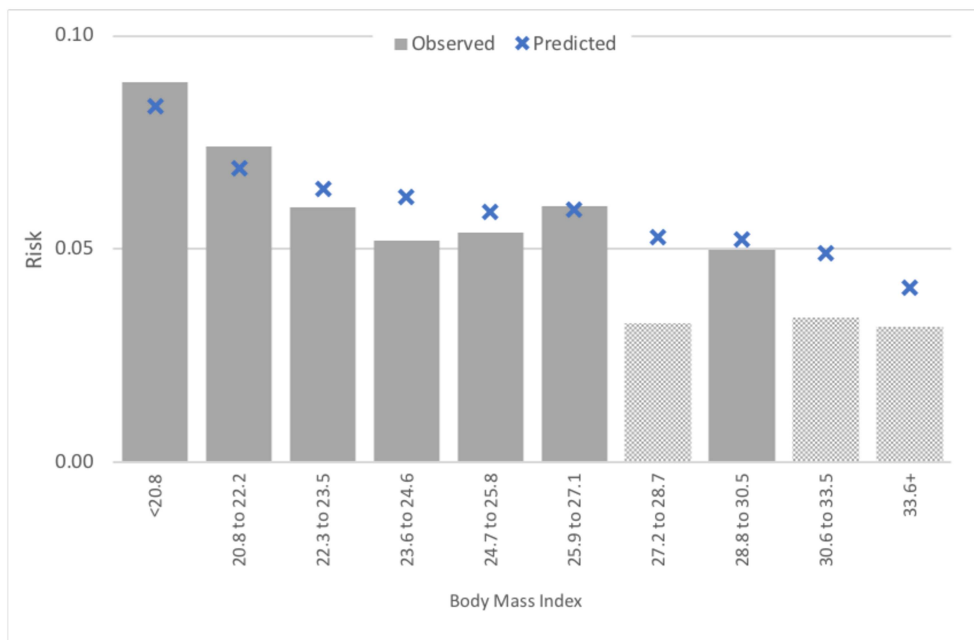

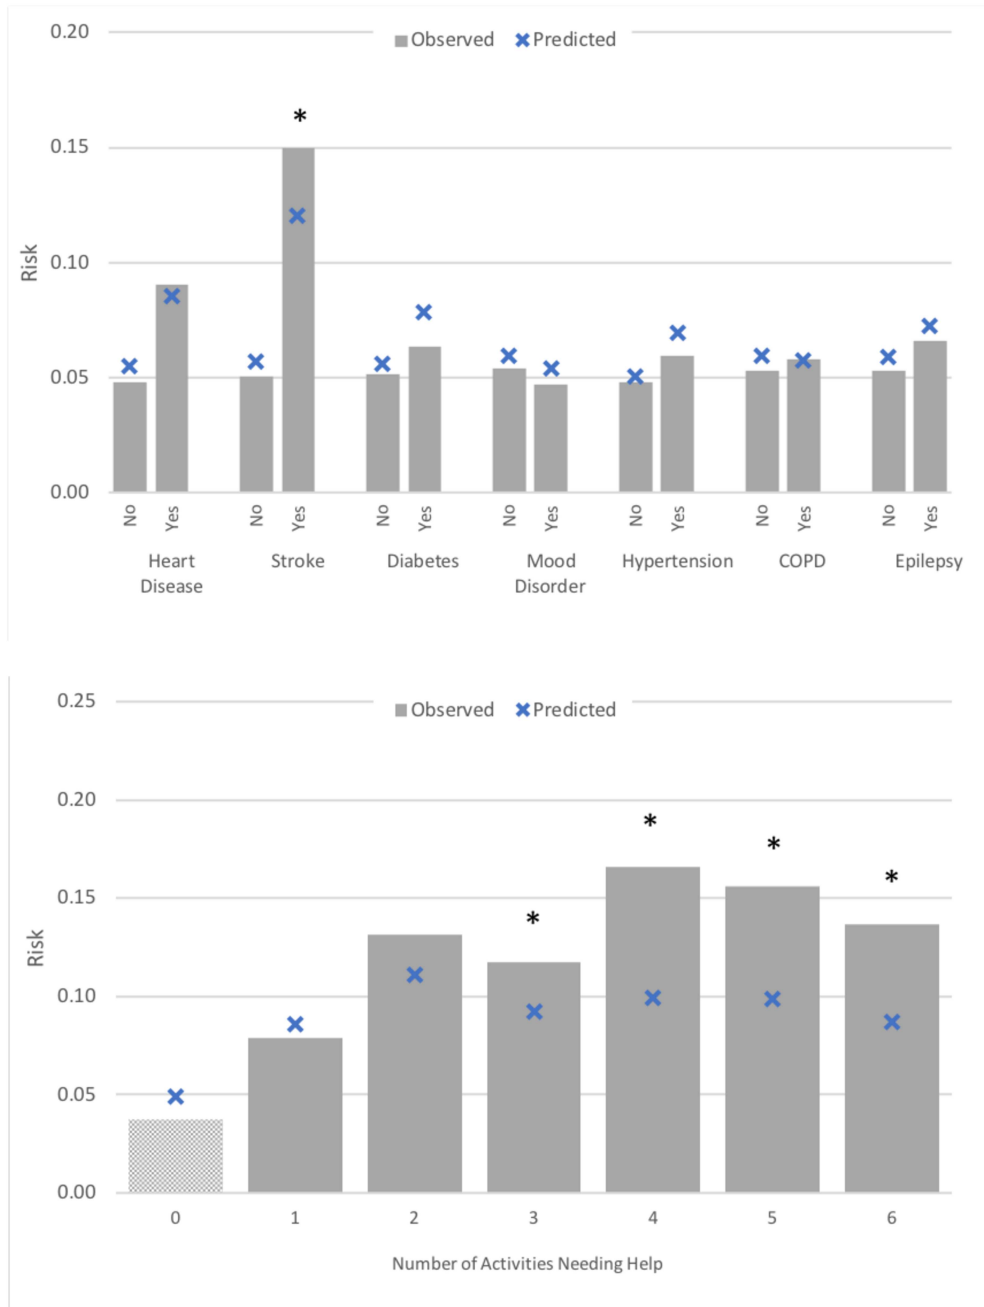

Supplement: jech-2020-214797supp001_data_supplement.pdf [file jech-2020-214797supp001_data_supplement.pdf]
